1 The balancing act of *Nipponites mirabilis* (Nostoceratidae, Ammonoidea):  
2 managing hydrostatics during a complex ontogenetic trajectory

3

4 Short title: Hydrostatics of *Nipponites mirabilis*

5

6 David J. Peterman<sup>1\*</sup>, Tomoyuki Mikami<sup>2</sup>, and Shinya Inoue<sup>3</sup>

7

8 <sup>1</sup>Department of Geology and Geophysics, University of Utah, Salt Lake City, Utah USA.

9 <sup>2</sup>Department of Biological Sciences, University of Tokyo, Tokyo, Japan.

10 <sup>3</sup>Hokkaido University Shuma-no-kai, Hokkaido, Japan.

11

12 \* Corresponding author

13 E-mail: [sphenodiscus24@gmail.com](mailto:sphenodiscus24@gmail.com)

14

15

16

17

18

19

20

21

22

23

## 24 **Abstract**

25 *Nipponites* is a heteromorph ammonoid with a complex and unique morphology that  
26 obscures its mode of life and ethology. The seemingly aberrant shell of this Late Cretaceous  
27 nostoceratid seems deleterious. However, hydrostatic simulations suggest that this morphology  
28 confers several advantages for exploiting a quasi-planktic mode of life. Virtual, 3D models of  
29 *Nipponites mirabilis* were used to compute various hydrostatic properties through 14 ontogenetic  
30 stages. At each stage, *Nipponites* had the capacity for neutral buoyancy and was not restricted to  
31 the seafloor. Throughout ontogeny, horizontally facing to upwardly facing soft body orientations  
32 were preferred. These orientations were aided by the obliquity of the shell's ribs, which were  
33 parallel to former positions of the aperture during life. Static orientations were somewhat fixed,  
34 inferred by stability values that are slightly higher than extant *Nautilus*. The initial open-whorled,  
35 planispiral phase is well suited to horizontal backwards movement with little rocking. *Nipponites*  
36 then deviates from this coiling pattern with a series of alternating U-shaped bends in the shell.  
37 This modification allows for proficient rotation about the vertical axis, while possibly  
38 maintaining the option for horizontal backwards movement by redirecting its hyponome. These  
39 particular hydrostatic properties likely result in a tradeoff between hydrodynamic streamlining,  
40 suggesting that *Nipponites* assumed a low energy lifestyle of slowly pirouetting in search for  
41 planktic prey. Each computed hydrostatic property influences the others in some way, suggesting  
42 that *Nipponites* maintained a delicate hydrostatic balancing act throughout its ontogeny in order  
43 to facilitate this mode of life.

44

45

46

## 47 Introduction

48 Heteromorph ammonoids are ectocochleate cephalopods whose shells undergo changes  
49 in coiling throughout ontogeny. The seemingly aberrant shape of some heteromorph ammonoids  
50 piques curiosity about their enigmatic modes of life and life habit. Arguably, the most bizarre  
51 and conspicuous of all heteromorph genera is the Late Cretaceous (Turonian – Coniacian)  
52 nostoceratid, *Nipponites* (Fig 1). Previous research has largely focused on the biostratigraphic  
53 usefulness of *Nipponites* [1–5] rather than its paleobiology [6–7] and evolutionary significance  
54 [8]. The latter two areas are valuable because the morphology of this heteromorph appears  
55 deleterious to survival; seemingly defying the basic principles of natural selection [9–15]. It is  
56 more likely, however, that its functional morphology is obscured by a complex ontogenetic  
57 trajectory in shell growth. The shell of *Nipponites* is characterized by having several open  
58 planispiral (crioconic) whorls in early ontogeny, followed by a series of alternating U-bends  
59 around the earlier whorls (Fig 1); denoting some degree of regularity in coiling throughout a  
60 seemingly-aberrant ontogeny [1,16,17]. Okamoto [18–20] demonstrated that the coiling of  
61 *Nipponites mirabilis* is, in fact, well constrained and can be approximated by a few piecewise  
62 equations (alternations of sinistral and dextral helicoid phases surrounding the crioconic phase).  
63 Similarly, differential geometry has proven a useful tool in modeling these complex  
64 heteromorphs [21–22].

65

66 **Fig 1. Hydrostatic Parameters of *Nipponites mirabilis*.** A, Side view of *Nipponites* in life  
67 position showing hypothetical centers of buoyancy (B), mass (M), and the horizontal axis of  
68 rotation (R). The angle of the aperture ( $\theta_a$ ) is measured as the inclination from the vertical plane.  
69 The thrust angle ( $\theta_t$ ) can be used to assess the directional efficiency of movement. This angle is

70 measured between the horizontal plane, and a line passing through R and the location of the  
71 hyponome (source of thrust; H). **B**, Front view of *Nipponites* in life position facing the aperture.  
72 This view shows the total lever arm (L) and its x-component ( $L_x$ ) which is proportionate to the  
73 amount of rotational movement about the vertical axis produced during jet propulsion. **C**, Top  
74 view of *Nipponites* in life position showing the rotational thrust angle ( $\theta_{tr}$ ). This angle is  
75 measured between the vertical rotation axis (vert.), which passes through B and M, and the  
76 direction of the thrust vector (arrow emanating from H). Rotational thrust angles of  $90^\circ$  result in  
77 idealized transmission of thrust into pure rotation.

78

79         The complex, meandering shell of *Nipponites* has invited several different interpretations  
80 regarding potential modes of life assumed by this heteromorph. The shell morphology of  
81 *Nipponites* has been compared to vermetid gastropods, and by analogy, this heteromorph has  
82 been suggested to assume a sessile and benthic mode of life [23–28]. Trueman [29] also  
83 considered *Nipponites* as a benthon, but with some degree of mobility. Other nostoceratid genera  
84 have been interpreted as negatively buoyant, benthic elements as well [28,30,31]. By similar  
85 analogy with other ‘irregularly-coiled’ mollusks, a symbiotic relationship with sponges or  
86 hydrozoans occupying the free space between the whorls of *Nipponites* has been speculated [32];  
87 although, no fossil evidence currently supports such a relationship. Contrasting benthic  
88 interpretations, Ward & Westermann [33] suggest that *Nipponites occidentalis* was capable of a  
89 planktic mode of life based on approximate calculations of organismal density. This mode of life  
90 is supported by Okamoto [19] for *Nipponites mirabilis* due to the oscillation of rib obliquity of  
91 the shell. Changes in rib obliquity suggests that some proper orientation of the soft body was  
92 preferred, which would not matter during a negatively buoyant condition. Favoring a planktic

93 mode of life, Westermann [6] inferred *Nipponites* was an occupant of the epipelagic, oceanic  
94 waters, perhaps as a vertical migrant or planktic drifter. This morphology is certainly not  
95 streamlined, suggesting that it would have experienced considerably more hydrodynamic drag  
96 than its planispiral counterparts. The unique shell of this genus raises questions regarding how its  
97 changes in coiling may reflect the modification of syn vivo hydrostatic properties; a tactic  
98 observed in other morphotypes of heteromorph ammonoids [17,19,20,34-39].

## 99 **Hydrostatic properties of heteromorph ammonoids**

100 The ability of ectocochleate cephalopods to attain neutral buoyancy is fundamental to  
101 reconstruct their modes of life. The variable interpretations for nostoceratid modes of life  
102 illustrate the importance of new techniques to determine the physical properties that would have  
103 acted on these living cephalopods. A neutrally buoyant condition is achieved when the total  
104 organismal mass is equal to the mass of the water displaced by the living animal. This depends  
105 upon the body chamber to phragmocone ratio. If the phragmocone (the chambered portion of the  
106 shell) is too small, the living cephalopod would not be able to compensate for its organismal  
107 weight and it would become negatively buoyant [34,36,40]. This condition also depends upon  
108 shell thickness and the densities assigned to each component of the living animal, which have  
109 been somewhat variable in previous research [39,41].

110 Previous studies have demonstrated that heteromorph ammonoids may have been able to  
111 achieve much different life orientations than their planispiral counterparts [20,29,34–39,42–45].  
112 These living cephalopods would have assumed some static orientation when their centers of  
113 buoyancy and mass were vertically aligned [41,46,47] (Fig 1). The difficulty to which these  
114 living cephalopods could deviate from their static orientation depends on hydrostatic stability,  
115 which is proportionate to the separation between the centers of buoyancy and mass [20]. High

116 stability would have reduced the influence of external forms of energy on orientation, but would  
117 have simultaneously made it more difficult for the living cephalopod to self-modify its  
118 orientation [36].

119         The directional efficiency of movement (thrust angle) depends upon the relative position  
120 of the source of thrust (the hyponome) and the center of rotation (the midpoint between the  
121 centers of buoyancy and mass; Fig 1A, B). Thrust energy produced by jet propulsion is more  
122 efficiently transmitted into movement in the direction where the hyponome and center of rotation  
123 are aligned [20,38,39,48,49]. If these two points were horizontally aligned (thrust angle of zero),  
124 more energy would be transmitted to horizontal movement with minimal rocking. The rocking  
125 behavior of extant nautilids is related to their sub-horizontal thrust angles and the retraction of  
126 the soft body during emptying of the mantle cavity [50].

127         A rotational component of energy is increased by turning the direction of thrust out of  
128 alignment with the centers of buoyancy and mass (the axis where idealized rotation would occur;  
129 Fig 1B, C). An increased distance of the hyponome from these two centers would therefore  
130 produce a lever arm that would impart a torque to rotate the living cephalopod about its vertical  
131 axis. This type of movement is likely to have taken place for turrilitid heteromorphs [34], as well  
132 as other morphotypes with their apertures positioned in a similar relative manner [37]. Idealized  
133 rotation about the vertical axis would occur with a long, horizontally oriented lever arm and a  
134 thrust vector adjoining its distal end with a right angle.

135         Each of these physical properties would have significantly constrained the hydrostatic  
136 and hydrodynamic capabilities of living *Nipponites* throughout its ontogeny. Therefore, they  
137 provide fundamental information regarding the possible modes of life and life habit for this  
138 unique ammonoid, as well as possible adaptations for locomotion and feeding.

139

## 140 **Methods**

141 Virtual models were constructed to determine the *syn vivo* hydrostatic properties of  
142 *Nipponites mirabilis*. Construction of the shell and other model components largely follow the  
143 methods of Peterman et al. [37–39], although a CT scanned specimen was used as the base  
144 model instead of using photogrammetry (similar to the methods of Morón-Alfonso [51]). This  
145 modification from the previous methods was preferred for this species due to the complex  
146 changes in shell ornamentation (rib obliquity). These ribs are parallel to the successive positions  
147 of the aperture throughout ontogeny, therefore retaining vital information about life orientation  
148 [20]. This method for virtual reconstruction is favorable for *Nipponites* because specimens of this  
149 genus are rarely found complete; discouraging destructive sampling techniques like serial  
150 grinding tomography. Computed tomography (CT) scans of such specimens also lack contrasts  
151 of X-ray attenuation factors to distinguish the shell from its surrounding materials [52].  
152 However, each of these tomographic techniques can provide very accurate measurements of  
153 hydrostatic properties and volumes when the specimens are adequate for imaging [52–59].

### 154 **Virtual modeling of the shell**

155 The shell of *Nipponites mirabilis* was constructed from an initial CT scan [60] of the  
156 specimen INM-4-346 (Museum Park Ibaraki Prefectural Museum of Nature), which had a  
157 remarkable degree of preservation. Most of the ontogeny is preserved for this specimen with  
158 minimal matrix on the inside (Fig 2A). However, two portions had to be virtually reconstructed;  
159 1) the crushed ~5 cm section of the adoral-most body chamber, and 2) the earliest crioconic  
160 whorls that are partially embedded in a remnant of the original concretion. These two portions of  
161 the shell were reconstructed (Fig 2B) with array algorithms [37–40], which replicate a whorl

162 section and simultaneously translate, rotate, and scale it to build the shell from the adoral  
163 direction to adapical direction (Table 1). Such arrays are similar to the morphospace parameters  
164 of Raup [61]. The CT scanned model [60] (which consists of a stack of .tiff images) was  
165 converted to the tessellated .stl format required for model reconstruction and volumetry using the  
166 program, Molcer 1.51 [62]. The external mesh of the tessellated file was isolated in order to get  
167 rid of internal features like fissures and X-ray attenuation artifacts. External defects were  
168 smoothed in Meshmixer 3.3 [63] while maintaining the curvature of neighboring, complete  
169 features. This external 3D mesh served as a stencil for the reconstruction of the missing and  
170 damaged portions of the shell. After the missing portions of the shell were combined to the  
171 model derived from the CT scan, the ornamentation was reconstructed by matching the width  
172 and amplitude of ribs with a torus shape in Blender [64], then properly oriented using the ribs  
173 present on the inner whorls. The ornamentation, reconstructed portions of the shell (Fig 2B), and  
174 the total external mesh were repaired and unified in Netfabb [65] to produce a single manifold  
175 mesh of the exterior shell. The program, Blender, was used to assign shell thickness to the  
176 external shell model based on measurements from specimen NMNS (National Museum of  
177 Nature and Science) MP35490 (Fig 3), producing a mesh denoting the entire shell without septa.  
178

179 **Fig 2. Virtual Reconstruction of the Shell of *Nipponites mirabilis*.** **A**, Tessellated (.stl) 3D  
180 model generated from a CT scan [60] of specimen INM-4-346. **B**, Reconstructed adoral portion  
181 of the body chamber and inner criocone phase with arrays algorithms (Table 1). **C**, Extruded  
182 septa generated from the suture pattern. **D**, Extruded shell and septa models unified together to  
183 produce a single, manifold 3D mesh of the entire shell.



184 **Fig 3. Thickness Measurements used for Virtual Model Extrusion.** Thicknesses of the shell  
 185 (black) and septa (grey) as a function of whorl height. Measurements were recorded from  
 186 specimen NMNS PM35490 and used to define thickness in the virtual model.

187

188 **Table 1. Reconstruction of the Shell**

| Terminal Body Chamber |                | Translation (mm) |         |         | Rotation (degrees) |      |       | Scale |       |       |
|-----------------------|----------------|------------------|---------|---------|--------------------|------|-------|-------|-------|-------|
| Array #               | # Replications | X                | Y       | Z       | X                  | Y    | Z     | X     | Y     | Z     |
| 1*                    | 67             | -0.035           | 0.018   | -0.265  | -0.70              | 0.59 | 0.40  | 1.000 | 1.000 | 1.000 |
| 2*                    | 29             | -6.722           | -6.548  | -14.237 | -0.70              | 1.00 | -0.60 | 1.000 | 1.001 | 1.002 |
| 3*                    | 40             | -11.103          | -12.910 | -16.980 | 0.20               | 0.19 | -1.70 | 1.002 | 0.999 | 1.001 |
| Criocone Phase        |                | Translation (mm) |         |         | Rotation (degrees) |      |       | Scale |       |       |
| Array #               | # Replications | X                | Y       | Z       | X                  | Y    | Z     | X     | Y     | Z     |
| 1*                    | 55             | -30.050          | -11.085 | 2.920   | 0.53               | 1.10 | 0.70  | 0.996 | 0.997 | 0.996 |
| 2                     | 100            | -30.057          | -11.171 | 2.960   | 0.37               | 1.30 | 0.88  | 0.996 | 0.996 | 0.996 |
| 3*                    | 122            | -14.760          | -14.063 | 5.757   | 0.39               | 0.88 | 0.69  | 0.998 | 0.998 | 0.998 |
| 4*                    | 83             | -25.009          | -11.595 | 5.269   | -0.15              | 1.80 | 0.70  | 0.997 | 0.997 | 0.997 |
| 5*                    | 59             | -20.306          | -15.710 | 10.206  | 0.38               | 1.00 | 0.50  | 0.998 | 0.998 | 0.998 |
| 6                     | 154            | -20.286          | -15.722 | 10.188  | 0.45               | 1.50 | 1.00  | 0.996 | 0.996 | 0.996 |

189 Array instructions used to reconstruct the juvenile criocone phase and the adoral portion of the  
 190 terminal body chamber. These arrays were used in a piecewise manner to replicate the whorl  
 191 section from the adoral direction to adapical direction by translation, rotation, and scaling in the  
 192 x, y, and z directions. Asterisks denote arrays that had their origins reset to their current locations  
 193 before replication. If origins were not reset, the origins of their previous arrays were used.

194

195 Septa were constructed by recording a suture pattern from specimen NMNS PM35490  
 196 (Fig 4). The external shell of this specimen (Fig 4B, C) was removed with air abrasives and  
 197 pneumatic tools under a stereoscopic microscope and the suture (Fig 4D) was recorded with a  
 198 digital camera lucida. This suture was imported in the Blender workspace and the curve modifier

199 was used to wrap it around the whorl section of the shell. This suture was then replicated and  
200 placed along the majority of the phragmocone so that adjacent lobules and folioles were almost  
201 tangential. Ontogenetic changes in the suture pattern were not considered because they probably  
202 represent only small differences in mass and its distribution. That is, each suture had the same  
203 degree of complexity and its expanded portion was placed adjacent to the venter throughout  
204 ontogeny. The crioconic, juvenile phase was reconstructed with array algorithms, which allowed  
205 septa to be duplicated with the same equations. The septa within the majority of the  
206 phragmocone were constructed by extruding the suture patterns inwards to a single point, then  
207 refining and smoothing the interior in order to approximate minimum curvature surfaces. A body  
208 chamber ratio of approximately 42% the total curvilinear length was measured from a  
209 remarkably complete specimen of *Nipponites mirabilis* from a private collection. This specimen  
210 was 3D scanned with an Artec Space Spider (to allow comparisons with the CT scanned  
211 specimen) and is housed in the morphosource database [66]. A nearly complete specimen of  
212 *Nipponites mirabilis* (MCM-A0435; Mikasa City Museum; Fig 4E) was also compared in this  
213 manner and stored in the database [66], which yielded an approximate body chamber ratio of  
214 36%. This ratio would be slightly higher if the aperture was not partially crushed. The proper  
215 number of septa to maintain the body chamber ratio of around 42% were placed in the  
216 phragmocone and extruded based on measured thicknesses from specimen NMNS PM35490  
217 (Fig 3). These final septa (Fig 2C) were merged with the extruded, external shell to produce a  
218 single, manifold 3D mesh of the entire, septate shell (Fig 2D).

219

220 **Fig 4. Specimens Used for Shell Reconstruction.** A, Original concretion containing NMNS  
221 PM35490. Umbilical view (B) and ventral view (C) of the shell section used to record the suture

222 pattern (**D**). **E**, 3D scan of the Mikasa City Museum Specimen (MCM-A0435) used to  
223 approximate the body chamber ratio. Scale bar = 2 cm.

224

## 225 **Virtual modeling of the soft body and camerae**

226 The shell constrains the size and shape of other model components that influence  
227 hydrostatics. A model of the soft body was constructed by isolating the internal interface of the  
228 body chamber, and similarly, the camerae were isolated from the phragmocone of the shell. The  
229 faces of both meshes were inverted so that the normals (vectors denoting the outside) were  
230 pointing in their proper directions. The ammonoid soft body is largely unknown; however, due to  
231 phylogenetic bracketing [67], the presence of ten arms can be inferred [68–70] with a possibly  
232 reduced soft body. A soft body resembling the consensuses of Klug & Lehmann [70] and  
233 Landman et al. [71] was constructed for *Nipponites* and unified to the repaired, isolated internal  
234 body chamber mesh. The camerae were later partitioned into fractions of cameral liquid and  
235 cameral gas for hydrostatic calculations. Both cameral liquid and cameral gas were assumed be  
236 evenly distributed in the phragmocone; a reasonable assumption based on the retention of  
237 cameral liquid via the pellicle and surface tension along septal margins [72]. This yielded mass  
238 distributions of the fractions of cameral liquid and cameral gas that have the same centers as the  
239 center of volume for all camerae.

## 240 **Modeling changes in shell morphology throughout ontogeny**

241 The final hydrostatic model of the adult *Nipponites mirabilis* was used to derive a total of  
242 14 models representing different life stages. This was accomplished by deleting the septa in the  
243 phragmocone and deleting the adoral portion of the body chamber so that the proper body  
244 chamber ratio was maintained throughout ontogeny. The total curvilinear distance along the

245 venter from the apex to the aperture was normalized by this same distance for the terminal stage,  
246 yielding a proxy for the age of each model (in terms of a relative percentage through the  
247 individual's lifespan).

## 248 **Hydrostatic calculations**

249 Neutral buoyancy occurs when the sum of organismal mass is equal to the mass of water  
250 displaced. The proportion of camerae to be emptied of cameral liquid relative to the total  
251 available cameral volume ( $\Phi$ ) that satisfies a neutrally buoyant condition was computed with the  
252 following equation (after Peterman et al., 2019a):

$$253 \quad \Phi = \frac{\left( \frac{V_{wd}\rho_{wd} - V_{sb}\rho_{sb} - V_{sh}\rho_{sh}}{V_{ct}} \right) - (\rho_{cl})}{(\rho_{cg} - \rho_{cl})} \quad (1)$$

254 Where  $V_{wd}$  and  $\rho_{wd}$  are the volume and density of the water displaced,  $V_{sb}$  and  $\rho_{sb}$  are the volume  
255 and density of the soft body,  $V_{sh}$  and  $\rho_{sh}$  are the volume and density of the shell,  $\rho_{cl}$  is the density  
256 of cameral liquid,  $\rho_{cg}$  is the density of cameral gas, and  $V_{ct}$  is the total cameral volume of the  
257 phragmocone. A soft body density of 1.049 g/cm<sup>3</sup> is preferred based on the measurement of  
258 *Nautilus* soft body by Hoffmann & Zachow [73] that was later averaged by a seawater-filled  
259 mantle cavity and thin mouthparts by Peterman et al. [38]. A shell density of 2.54 g/cm<sup>3</sup> was  
260 adopted from Hoffman & Zachow [73]. The cameral liquid density of 1.025 g/cm<sup>3</sup> [74] and  
261 cameral gas density of 0.001 g/cm<sup>3</sup> are used in the current study.

262 The total center of mass is weighted according to each material of unique density (i.e., the  
263 soft body, shell, cameral liquid, and cameral gas in the current study). Each individual center of  
264 mass for the soft body, shell, cameral liquid, and cameral gas were computed in MeshLab [75]  
265 and the total center of mass was computed with the equation:

$$266 \quad M = \frac{\sum(L * m_o)}{\sum m_o} \quad (2)$$

267 Where M is the total center of mass in a principal direction, L is the center of mass of a single  
268 object measured with respect to an arbitrary datum in each principal direction, and  $m_o$  is the  
269 mass of any particular object that has a unique density. Equation 2 was used in the x, y, and z  
270 directions to compute the coordinate position of the center of mass.

271 The center of buoyancy (B) is equal to the center of volume of the medium displaced by  
272 the external model. A model denoting the exterior interface of *Nipponites* was constructed from  
273 the external shell and soft body protruding from the aperture and its center was computed in  
274 MeshLab.

275 The static orientation of the total model occurs when B and M are vertically aligned. The  
276 hydrostatic stability index is computed from these centers.

$$277 \quad S_t = \frac{|B - M|}{\sqrt[3]{V}} \quad (3)$$

278 The separation between the centers of buoyancy (B) and mass (M) is normalized by the cube root  
279 of the organismal volume (V; equal to the volume of seawater displaced) in order to be applied  
280 to ectocochleates with irregular coiling [20].

281 Apertural angles ( $\theta_a$ ) were measured with respect to the vertical (Fig 1A). That is, angles  
282 of zero correspond to a horizontally facing soft body, angles of +90° correspond to an upward  
283 facing soft body, and angles of -90° correspond to a downward facing soft body.

284 Thrust angles ( $\theta_t$ ) were measured with respect to the horizontal (Fig 1B) between the  
285 point source of thrust and the rotational axis. Therefore, as the thrust angle approaches zero,  
286 more energy is transmitted into horizontal movement with a lower rotational component.

287 Rotational thrust angles ( $\theta_{tr}$ ) were measured between the thrust vector (perpendicular to  
288 the aperture) and the rotational axis (Fig 1C). A rotational thrust angle of 90° would allow pure  
289 rotation to take place, while angles of 0° and 180° would result in translational movement.

290

## 291 Results

292 The unknown soft body can produce errors in buoyancy calculations depending upon its  
293 total volume. By comparing the soft body used herein with a soft body that terminates at the  
294 aperture, there is only a 0.5% difference in  $\Phi$ . Similarly, the mass distribution is not significantly  
295 different between either model (a 0.7 % difference in  $S_t$ ).

296 Because the body chamber ratio was variable on measured specimens, this ratio was  
297 manipulated by removing one septum and adding one septum to the terminal stage model with a  
298 body chamber ratio of 42%. Removing one septum increases the total body chamber ratio to  
299 46%. This change yields a 16% increase in  $\Phi$  (to 84.6%) and a 7% increase in  $S_t$  (to 0.0786).  
300 Adding one septum decreases the body chamber ratio to 37%. Yielding a 10% decrease in  $\Phi$  (to  
301 65.7%) and an 8% decrease in  $S_t$  (to 0.0676). These changes suggest that small error (~10%) in  
302 body chamber ratio would not significantly alter calculations of buoyancy or the characteristics  
303 of the mass distribution. Small deviations from the ideal body chamber ratio took place (Table 2)  
304 during model construction. However, the body chamber ratio test suggests that their hydrostatic  
305 influences are minimal.

306

307 **Table 2. Hydrostatic properties of *Nipponites mirabilis*.**

| Stage    | Age (%) | BC Ratio | $\Phi$ | $S_t$ | $\theta_a$ | $\theta_{ao}$ | L (mm) | $L_x$ (mm) | L norm | $L_x$ norm | $\theta_t$ | $\theta_{tr}$ |
|----------|---------|----------|--------|-------|------------|---------------|--------|------------|--------|------------|------------|---------------|
| (Crio) 1 | 0.18    | 42.7     | 97.3   | 0.099 | 69.5       | 69.0          | 11.65  | 11.43      | 1.236  | 1.212      | 11.1       | 7.7           |
| 2        | 0.23    | 38.6     | 82.6   | 0.101 | 74.3       | 49.5          | 10.59  | 10.59      | 0.902  | 0.902      | 1.0        | 117.8         |
| 3        | 0.29    | 40.1     | 83.5   | 0.094 | 13.8       | 14.5          | 10.04  | 9.43       | 0.726  | 0.682      | -20.1      | 117.1         |
| 4        | 0.33    | 39.7     | 76.4   | 0.093 | 99.5       | 99.5          | 9.58   | 8.61       | 0.616  | 0.554      | 26.0       | 98.2          |
| 5        | 0.38    | 42.8     | 77.4   | 0.069 | 2.0        | -30.3         | 13.28  | 11.19      | 0.773  | 0.651      | -32.6      | 135.5         |

|                      |      |      |      |       |      |       |       |       |       |       |       |       |
|----------------------|------|------|------|-------|------|-------|-------|-------|-------|-------|-------|-------|
| <b>6</b>             | 0.41 | 42.7 | 75.5 | 0.082 | 22.9 | 24.1  | 14.61 | 12.23 | 0.787 | 0.659 | -33.1 | 139.1 |
| <b>7</b>             | 0.49 | 42.6 | 81.7 | 0.070 | 24.1 | 5.0   | 16.64 | 14.32 | 0.765 | 0.658 | -30.6 | 124.5 |
| <b>8</b>             | 0.55 | 41.6 | 79.8 | 0.083 | 31.5 | 22.4  | 19.51 | 16.20 | 0.821 | 0.682 | -33.9 | 143.0 |
| <b>9</b>             | 0.60 | 42.2 | 79.8 | 0.083 | 31.6 | 18.8  | 18.88 | 16.49 | 0.753 | 0.658 | -29.1 | 113.4 |
| <b>10</b>            | 0.71 | 41.8 | 81.3 | 0.079 | 34.5 | 15.1  | 21.92 | 21.72 | 0.758 | 0.752 | -7.6  | 123.2 |
| <b>11</b>            | 0.77 | 41.2 | 76.3 | 0.075 | 17.3 | -12.7 | 22.18 | 17.38 | 0.720 | 0.564 | -38.4 | 122.0 |
| <b>12</b>            | 0.83 | 43.5 | 75.4 | 0.076 | 50.1 | 39.8  | 27.54 | 27.38 | 0.835 | 0.830 | -6.2  | 154.2 |
| <b>13</b>            | 0.88 | 39.1 | 72.2 | 0.072 | -8.2 | -11.1 | 27.66 | 24.86 | 0.807 | 0.726 | -26.0 | 105.9 |
| <b>(Term)<br/>14</b> | 1.00 | 42.1 | 73.1 | 0.073 | 19.9 | 30.0  | 28.10 | 23.44 | 0.781 | 0.651 | -33.5 | 131.1 |

308 Hydrostatic properties computed for the 14 ontogenetic stages examined. Crio = criocone phase;  
 309 Term = terminal phase; Age% = curvilinear length for that stage normalized by the curvilinear  
 310 length of the terminal specimen; BC Ratio = curvilinear length of body chamber normalized by  
 311 the total curvilinear length at a particular stage;  $\Phi$  = the proportion of the phragmocone to be  
 312 emptied of liquid for a neutrally buoyant condition;  $S_t$  = hydrostatic stability index;  $\theta_a$  = apertural  
 313 angle;  $\theta_{ao}$  = apertural orientation if rib obliquity was ignored (normal to shell growth direction);  
 314 L = total lever arm;  $L_x$  = x-component of the lever arm, norm = normalized by the cube root of  
 315 water displaced for each particular stage;  $\theta_t$  = thrust angle;  $\theta_{tr}$  = rotational thrust angle.

316

## 317 **Ontogenetic changes in hydrostatics**

318 Hydrostatic properties were computed for 14 life stages (Figs 5 and 6; Table 2) in order  
 319 to assess changes throughout the ontogeny of *Nipponites mirabilis* and other species sharing  
 320 similar morphologies. *Nipponites mirabilis* has the capacity for neutral buoyancy at all life  
 321 stages, retaining liquid between approximately 3% and 28% of the total cameral volumes. After  
 322 the juvenile criocone phase,  $\Phi$  decreases and stabilizes at its lower values (Fig 7). Hydrostatic  
 323 stability ( $S_t$ ) follows a similar decreasing trend and does not significantly oscillate (Fig 7). These  
 324 hydrostatic stability index values ranging between approximately 0.10 and 0.07 are sufficiently

325 large enough to orient the living cephalopod to maintain some static orientation during all of the  
326 examined ontogenetic stages. The orientation of the aperture ( $\theta_a$ ) oscillates in a complicated  
327 fashion throughout ontogeny, ranging between approximately -11 and 99 degrees (Fig 7).  
328 Apertural orientations significantly turned downwards are not observed. The juvenile criocone  
329 phase has apertural angles of about 70°, followed by complex oscillations as the alternating U-  
330 shaped bends develop. Afterwards, there is some degree of regularity in orientation, mostly  
331 exhibiting horizontal and diagonally upwards directions (Fig 7).

332

333 **Fig 5. Final hydrostatic models of the first eight ontogenetic stages (A-H) of *Nipponites***

334 *mirabilis*. All models are oriented so that their ventral apertures face towards the right. The tip of  
335 the upper cone corresponds to the center of buoyancy while the tip of the lower cone is the center  
336 of mass. These two centers are vertically aligned, denoting the proper static orientation assumed  
337 by living *Nipponites mirabilis*.

338 **Fig 6. Final hydrostatic models of the last six ontogenetic stages (A-F) of *Nipponites***

339 *mirabilis*. All models are oriented so that their ventral apertures face towards the right. The tip of  
340 the upper cone corresponds to the center of buoyancy while the tip of the lower cone is the center  
341 of mass. These two centers are vertically aligned, denoting the proper static orientation assumed  
342 by living *Nipponites mirabilis*.

343 **Fig 7. Hydrostatic Properties Computed Throughout Ontogeny.** The proportion of the

344 phragmocone to be emptied of cameral liquid for neutral buoyancy ( $\Phi$ ; circles), hydrostatic  
345 stability index ( $S_t$ ; squares), and apertural angles ( $\theta_a$ ; triangles) as a function of age (proxied by  
346 the curvilinear length for that stage normalized by the curvilinear length of the terminal  
347 specimen). Dashed lines denote interpolations between the 14 measured stages.



348

## 349 **Rib obliquity and static orientation**

350 While apertural orientations during the ontogeny of *Nipponites mirabilis* vary, horizontal  
351 to upward orientations are preferred. This is further supported by comparing the apertural angles  
352 (as denoted by the orientation of the ribs on the shell) with the same angle if ribs were not  
353 oblique (i.e., if the aperture was perfectly perpendicular to the direction of shell growth). The  
354 obliquity of the ribs generally enhances the apertural orientation by about 10° in the upwards  
355 direction (Fig 8).

356

357 **Fig 8. The Influence of Rib Obliquity on Orientation.** Apertural angles with observed rib  
358 obliquity ( $\theta_a$ ; triangles) and the angles normal to the direction of shell growth (zero obliquity;  
359 circles) as a function of age (proxied by the curvilinear length for that stage normalized by the  
360 curvilinear length of the terminal specimen). Light grey shading and dark grey shading denote  
361 rib obliquity that boosts  $\theta_a$  in the upwards direction and downward directions, respectively.

362

## 363 **Directional efficiency of movement**

364 During the juvenile crioconic phase, *Nipponites mirabilis* is well suited for horizontal  
365 backwards movement (denoted by the near zero thrust angles;  $\theta_t$ ). This trend somewhat persists  
366 into later ontogenetic stages, while slightly decreasing and remaining above -40°. However, after  
367 the crioconic phase, the rotational thrust angle ( $\theta_{tr}$ ) dramatically increases as the U-shaped bends  
368 in the shell develop; suggesting that there is a strong rotational component of movement when  
369 thrust is produced normal to the aperture (Fig 9). While the normalized lever arm lengths seem to  
370 decrease during ontogeny, sufficient torques for rotation can only be produced when the

371 rotational thrust angle is high. Furthermore, the x-component of the normalized lever arm is not  
372 significantly lower than the total normalized lever arm during ontogeny, suggesting that the  
373 subhorizontal declination of the total lever arms would still provide significant rotational  
374 movement in ontogenetic stages after the crioconic phase (Fig 9).

375

376 **Fig 9. The Directional Efficiency of Movement.** Thrust angles in the vertical direction ( $\theta_t$ ;  
377 black dashed line), rotational thrust angles ( $\theta_{tr}$ ; grey dashed line), and lever arms as a function of  
378 age (proxied by the curvilinear length for that stage normalized by the curvilinear length of the  
379 terminal specimen). The total lever arm (grey solid line) and x-component of that lever arm (X  
380 Lever Arm; solid black line) are both normalized by the cube root of the volume of water  
381 displaced ( $V_{wd}$ ) for each stage. Idealized rotation would take place with high, relative x-  
382 components of the lever arm and  $\theta_{tr}$  of  $90^\circ$ . Idealized horizontal movement would occur with  $\theta_t$   
383 of  $0^\circ$  and  $\theta_{tr}$  of  $0^\circ$  or  $180^\circ$ .

384

## 385 Discussion

### 386 The mode of life of *Nipponites*

387 Hydrostatic simulations reveal that *Nipponites mirabilis* had the capacity for neutral  
388 buoyancy throughout its ontogeny, retaining some amount of cameral liquid in the shell to  
389 compensate for residual buoyancy (Fig 7). These results support the buoyancy calculations of  
390 Ward and Westermann [33], who report a similar scenario for *Nipponites occidentalis*. The  
391 inferences drawn from rib obliquity most likely functioning in a neutrally buoyant setting [19]  
392 are also supported by the hydrostatic results. While the coiling of *Nipponites* is complex and

393 somewhat resembles vermetid gastropods [23–27], considerable negative buoyancy and resultant  
394 benthic modes of life are unlikely.

395         Hydrostatic stability is significantly large enough for living *Nipponites* to assume static,  
396 syn vivo orientations throughout its entire ontogeny (excluding some short time after hatching  
397 when Reynolds numbers are significantly low). While the hydrostatic stability index slightly  
398 decreases throughout ontogeny, the computed values are all larger than the extant *Nautilus*  
399 (~0.05 [40]), suggesting that living *Nipponites* probably was not able to significantly modify its  
400 own apertural orientation (in terms of its vertical orientation). The highest stability in  
401 ectocochleates seem to occur for the orthocones, especially those without cameral deposits  
402 [36,40]. Lower stability values should occur for morphotypes with larger body chambers that  
403 wrap around the phragmocone (e.g., serpenticones [6,47,49]). At first glance, *Nipponites* seems  
404 to fall into this latter category at later ontogenetic stages because of the series of alternating U-  
405 bends surrounding the earlier crioconic phase and somewhat large body chamber. However, the  
406 sigmoidal soft body (which heavily influences the total mass distribution) actually seems to be  
407 somewhat confined in the vertical directions (Figs 5 and 6). That is, most of the soft body is still  
408 distributed below the phragmocone, lowering the center of mass relative to the center of  
409 buoyancy and increasing hydrostatic stability. In most cases, uncoiling of the shell seems to  
410 generally increase hydrostatic stability compared to planispiral ectocochleates  
411 [20,36,37,39,45,76].

412         Due to sufficient hydrostatic stability throughout ontogeny, fixed static orientations are  
413 assumed by living *Nipponites mirabilis*. That is, upward to horizontally facing orientations are  
414 preferred, while downward facing orientations were not observed in any of the examined  
415 ontogenetic stages (Fig 7). These observed orientations may have accommodated a lifestyle of

416 feeding upon small prey in the water column, which has been proposed for other nostoceratid  
417 heteromorphs [37,45,77]. There is some period of time between about 20% and 40% of the  
418 lifespan of *Nipponites mirabilis* (after the crioconic phase and prior to the establishment of  
419 regularly alternating U-bends) where orientation oscillates between upward facing and  
420 horizontally facing. These somewhat rapid changes may have been an awkward time for these  
421 living heteromorphs. On the other hand, this irregularity infers that *Nipponites* was able to  
422 assume a functioning lifestyle regardless of these particular differences in orientation. This  
423 indifference further suggests that this heteromorph assumed a low energy lifestyle that does not  
424 demand athletic predation or predator evasion.

425         If the ribs of *Nipponites mirabilis* were not oblique, the static orientation of this species  
426 would be about 10° less (downward) for many of the examined ontogenetic stages (Fig 8). The  
427 obliquity of the ribs (which oscillates in magnitude throughout ontogeny [19]), therefore, assists  
428 in maintaining a generally horizontal to diagonally upward facing orientation of the soft body.  
429 Rib obliquity also suggests that the evasion of downward orientations was required to effectively  
430 function for feeding and perhaps locomotion for most stages.

### 431 **Locomotion of *Nipponites mirabilis***

432         The juvenile crioconic phase of *Nipponites mirabilis* would have been well suited to  
433 horizontal backwards movement with minimal rocking due to its low thrust angles and  
434 positioning of the hyponome (and thrust vector) relative to the vertical rotational axis (Fig 1A, B;  
435 Fig 9). Similar hydrostatic properties are likely for criocone morphotypes with similar  
436 proportions. Thrust angles decrease throughout ontogeny with some degree of oscillation but  
437 remain above -40°. These thrust angles at later stages suggest that significant amounts of thrust  
438 energy would still be transmitted into horizontal backwards movement, though with some degree

439 of rocking. The subzero thrust angles post-criconic phase result in the point of thrust located  
440 below the horizontal rotational axis suggesting that movement would be rather complicated, with  
441 oscillations in apertural angles about some horizontal axis and vertical axis, simultaneously. By  
442 examining the lever arms (normalized for each ontogenetic stage), the horizontal components of  
443 the lever arms are not much lower than the total lever arms, suggesting that rotational torque  
444 about the vertical axis during jet propulsion would be significant. After the criconic phase, the  
445 alternating U-bends in the shell allow the thrust vector to be rotated out of alignment with the  
446 vertical rotational axis that passes through the centers of buoyancy and mass. This misalignment  
447 after the criconic phase allows rotation about the vertical axis to take place if thrust is produced  
448 normal to the orientation of the aperture. However, this rotational thrust angle is not as ideal as  
449 torticonic (helical) heteromorphs like the turrilitids [34] and the intermediate phases of  
450 *Didymoceras* [37], which are closer to 90°. Instead, these rotational thrust angles, post-criconic  
451 phase, fall between pure rotation (90°) and pure translation (180°) at around 135° (with some  
452 amount of variation throughout ontogeny). If the hyponome was able to bend 45° right or left,  
453 then living *Nipponites* may have been able to select between pure rotational movement and pure  
454 translational movement (influenced by some superimposition of chaotic rocking and  
455 hydrodynamic drag). This scenario depends upon the largely unknown ammonoid soft body  
456 [69,70] and propulsive mechanisms [68]. If the hyponome was not able to significantly bend,  
457 then jet thrust for post-cricone phase individuals would be transmitted into a combination of  
458 translation and rotation about the vertical axis.

459         The thrust angles and directional efficiency of movement provide useful information  
460 about the locomotion and feeding of living *Nipponites*. The lateral movement (and perhaps  
461 dispersal potential) of criconic juveniles would have been on par with planispiral ammonoids

462 (albeit with higher hydrodynamic drag), but afterwards, movement is complicated and some  
463 amount of rocking and rotation would occur. This rotational movement (pirouetting), however,  
464 could have been useful in feeding, perhaps improving the amount of space through which the  
465 living ammonoid could have searched for and captured small planktic prey. These hydrostatic  
466 properties further support a quasi-planktic, low energy mode of life for *Nipponites*.

## 467 **Complex heteromorphy in an evolutionary context**

468 Okamoto [78] suggests that *Nipponites* originated from the nostoceratid,  
469 *Eubostrioceras* based on comparisons of shell sculpture, early shell morphology, and  
470 stratigraphic occurrence. In a theoretical framework, the juvenile crioconic coiling of both  
471 *Eubostrioceras japonicum* and its probable descendent, *Nipponites mirabilis*, are very similar.  
472 After this phase, the former species retains helical coiling throughout its ontogeny while the  
473 latter species alternates sinistral and dextral helical coiling [17–21,78]. While the details of the  
474 rather-sudden appearance of *Nipponites* remain unclear, the simulations of the current study infer  
475 significant differences in hydrostatic properties between these two nostoceratid genera.  
476 *Eubostrioceras japonicum* undergoes similar coiling patterns to the nostoceratid,  
477 *Didymoceras*, but has a longer, stretched out helical phase. Hydrostatic simulations by Peterman  
478 et al. [37] reveal that *Didymoceras* was poorly suited for lateral movement, yet adept at rotating  
479 about its vertical axis. These properties are likely analogous to *Eubostrioceras*. While  
480 *Nipponites* has a similar ability to rotate about its vertical axis after the criocone phase,  
481 horizontal to diagonally upwards orientations are assumed instead of the likely downward  
482 diagonal orientations of *Eubostrioceras*. For *Eubostrioceras* to attain *Nipponites*-like  
483 orientations, its shell would have to coil upwards, compromising its helical coiling. Furthermore,  
484 the alternating U-bends in *Nipponites* retain some degree of lateral movement potential.

485 Therefore, the seemingly-aberrant coiling of *Nipponites* might represent adaptations to  
486 maintaining preferred orientations and effective directions of locomotion.

487 The hydrostatic simulations of *Nipponites mirabilis* also provide a frame of reference for  
488 other nostoceratid heteromorphs. *N. occidentalis*, for example, exhibits a larger degree of  
489 uncoiling [33], and therefore, may have had higher stability and a larger lever arm for rotation.  
490 Similarly, throughout the late Turonian and Coniacian, a larger degree of uncoiling takes place  
491 for specimens found in successively younger strata [78]. These specimens cluster into three  
492 distinguished morphotypes [78] that may have become more stable and adept at rotation as they  
493 progressed through this time interval.

## 494 **The stigma of heteromorphy**

495 Heteromorph ammonoids have been commonly regarded as bizarre evolutionary  
496 experiments or degenerates [8–15], and their unique coiling schemes are enigmatic in terms of  
497 their functional morphology and potential modes of life. While the inevitable phylogenetic  
498 extinction of heteromorphs (i.e., typolysis) is now rebutted [8], the stigma of this concept has  
499 persisted and is further propagated by their seemingly aberrant coiling schemes. Heteromorph  
500 ammonoids, however, were very diverse, disparate, and successful throughout the Cretaceous  
501 [45,79–81]. Furthermore, the coiling schemes of several morphotypes of heteromorph  
502 ammonoids suggest that they exploited unique solutions to manage the physical properties that  
503 constrained their modes of life by modifying their shells to serve primarily as specialized  
504 hydrostatic devices [36–39]. The hydrostatic simulations of the current study reveal that the  
505 coiling of *Nipponites*, which seems biologically absurd, does in fact confer an advantage for  
506 specific syn vivo orientations and with rotational capabilities. As suggested for several

507 heteromorphs, the niche currently occupied by cranchid squids may be a suitable analogy for the  
508 niche once occupied by *Nipponites* [6,33,76,82].

509

## 510 **Conclusions**

511 Hydrostatic analyses support a quasi-planktic mode of life for *Nipponites mirabilis* with  
512 unique forms of movement that could have enabled a planktotrophic feeding strategy. This  
513 species and other heteromorphs with similar proportions had the capacity for neutral buoyancy  
514 and were not restricted to the benthos. Throughout the ontogeny of *Nipponites*, horizontally  
515 facing to upwardly facing soft body orientations were occupied. These orientations were likely  
516 preferred for feeding on small plankton in the water column. This behavior is supported by the  
517 tendency for rib obliquity to oscillate [19], which was primarily found to upwardly adjust  
518 apertural orientations. Somewhat larger hydrostatic stability values, relative to *Nautilus*, suggest  
519 that the vertical component of the apertural orientation would not have significantly changed  
520 during locomotion or interaction with external forms of energy. A change in hydrostatics takes  
521 place between the juvenile criocone stage and the later stages consisting of alternating U-bends  
522 in the shell, specifically regarding the directional propensity for movement. Although the  
523 criocone phase of *Nipponites* likely experienced more hydrodynamic drag than planispiral  
524 ammonoids of similar size, this morphology was stable, and proficient at backwards horizontal  
525 movement. As the alternating U-bends develop, *Nipponites* is better suited for rotational  
526 movement about its vertical axis, while possibly maintaining the option to move horizontally  
527 backwards by changing the direction of its hyponome. These forms of movement were likely  
528 slow, however, suggesting that *Nipponites* assumed a low energy lifestyle while pirouetting to  
529 scan for small prey in the water column. The hydrostatic properties throughout the ontogeny of



530 *Nipponites* contrast with those of its probable ancestor, *Eubostriochoceras* [78]. These differences  
531 in morphology along with the hydrostatic analyses in the current study infer that the seemingly  
532 convoluted coiling scheme of *Nipponites* represents unique adaptive solutions to several  
533 hydrostatic constraints, rather than random morphological aberration.

534

## 535 **Acknowledgements**

536 We thank the Palaeontological Society of Japan for making CT scan data of INM-4-346  
537 and other reference specimens available online. We also thank Keita Mori for donating NMNS  
538 PM35490. We appreciate Kei Takano for allowing us to image a private specimen used to  
539 estimate the body chamber ratio. Thanks to Daisuke Aiba, Tomoki Karasawa, and Takatoshi  
540 Tsuji for assistance with the 3D scans of MCM-A0435. Finally, we thank the Masason  
541 Foundation, the ANRI fellowship, and the JSPS (Japan Society for the Promotion of Science)  
542 KAKENHI (#18J21859) for funding a portion of this research.

543

## 544 **References**

- 545 1. Matsumoto, T. Some heteromorph ammonites from the Cretaceous of Hokkaido. Mem  
546 Fac Sci Kyushu Univ ser D Geol. 1977;23: 303-366.
- 547 2. Matsumoto, T. The so-called Turonian-Coniacian boundary in Japan. Bull Geol Soc  
548 Denmark. 1984;33: 171-181.
- 549 3. Hirano, H. Cretaceous biostratigraphy and ammonites in Hokkaido, Japan. Proc Geol  
550 Ass. 1982;93: 213-223.

- 551 4. Hasegawa, T., Pratt, L.M., Maeda, H., Shigeta, Y., Okamoto, T., Kase, T., et al. Upper  
552 Cretaceous stable carbon isotope stratigraphy of terrestrial organic matter from Sakhalin,  
553 Russian Far East: a proxy for the isotopic composition of paleoatmospheric CO<sub>2</sub>.  
554 *Palaeogeogr Palaeoclimatol Palaeoecol.* 2003;189: 97-115. doi: 10.1016/S0031-  
555 0182(02)00634-X.
- 556 5. Yazykova, E.A., Peryt, D., Zonova, T.D., Kasintzova, L.I. The Cenomanian/Turonian  
557 boundary in Sakhalin, Far East Russia: ammonites, inoceramids, foraminifera, and  
558 radiolarians. *New Zealand J Geol.* 2004;47: 291-320. doi:  
559 10.1080/00288306.2004.9515057.
- 560 6. Westermann, G.E.G. Ammonoid life and habitat. *In*: Landman, N.H., Tanabe, K., and  
561 Davis, R.A. (eds.), *Ammonoid Paleobiology. Topics in Geobiology.* 1996;13: 607–707.
- 562 7. Westermann, G.E.G., Tsujita, C.J. Life habits of ammonoids. *in*: Savazzi, E. (ed).  
563 *Functional Morphology of the Invertebrate Skeleton.* Wiley, Chichester; 1999. pp. 299-  
564 325.
- 565 8. Wiedmann, J. The heteromorphs and ammonoid extinction. *Biol Rev Camb Philos Soc.*  
566 1969;44: 1-563. doi: 10.1111/j.1469-185X.1969.tb00612.x.
- 567 9. Swinnerton, H.H. *Outlines of Palaeontology.* London: Arnold; 1930.
- 568 10. Dacqué, E. *Organische Morphologie und Paläontologie.* Berlin: Borntraeger; 1935.
- 569 11. Schindewolf, O.H. *Palaontologie, Entwicklungslehre und Genetik.* Berlin: Borntraeger;  
570 1936.
- 571 12. Schindewolf, O.H. Darwinismus oder Typostrophismus? *Magyar biol. Kut. Munk.*  
572 1945;16: 104-177.
- 573 13. Schindewolf, O.H. *Grundfragen der Paläontologie.* Stuttgart : Schweizerbart; 1950.

- 574 14. Erben, H.K. Das stammesgeschichtliche Degenerieren und Aussterben. A.d. Heimat.  
575 1950;58: 116-123.
- 576 15. Müller, A.H. Der Grobablauf der stammesgeschichtlichen Entwicklung. Jena: Fischer;  
577 1955.
- 578 16. Yabe, H. Cretaceous Cephalopoda from the Hokkaido, Part 2. Journ Coll Sci Imp Univ  
579 Tokyo. 1904;20: 1-45.
- 580 17. Seilacher, A., Gishlick, A. Morphodynamics. Boca Raton, FL; 2015.
- 581 18. Okamoto, T. Theoretical morphology of *Nipponites* (a heteromorph ammonoid).  
582 Palaeontol Soc Jpn. 1984;36: 37-51. doi: 10.14825/kaseki.36.0\_37.
- 583 19. Okamoto, T. Developmental regulation and morphological saltation in the heteromorph  
584 ammonite *Nipponites*. Paleobiology. 1988;14: 272-286. doi:  
585 10.1017/S0094837300012008.
- 586 20. Okamoto, T. Theoretical modeling of ammonoid morphology. In: Landman, N.H.,  
587 Tanabe, K., and Davis, R.A. (eds.), Ammonoid Paleobiology. Topics in Geobiology 13;  
588 1996. pp. 225-251.
- 589 21. Okamoto, T. Analysis of heteromorph ammonoids by differential geometry.  
590 Palaeontology. 1988;31: 37-51.
- 591 22. Illert, C. *Nipponites mirabilis*: a challenge to seashell theory. Nuovo Cimento. 1990;12:  
592 1405-1421.
- 593 23. Diener, C. Lebensweise und Verbreitung der Ammoniten. Neues Jahrb Geol Palaontol  
594 Abh. 1912;2: 67-89.
- 595 24. Berry, E. Cephalopod adaptations – The record and its interpretations. Q Rev Biol.  
596 1928;3: 92-108.

- 597 25. Schmidt, H. Über die Bewegungsweise der Schalencephalopoden. *Paläontol Z.* 1930;12:  
598 194-208.
- 599 26. Moore, R., Lalicker, C., Fischer, A. *Invertebrate fossils.* McGraw-Hill Co., New York;  
600 1952.
- 601 27. Tasch, P. *Paleobiology of the invertebrates.* J. Wiley and Sons, New York; 1973.
- 602 28. Ebel, K. Mode of life and soft body shape of heteromorph ammonites. *Lethaia.* 1992;25:  
603 179-193. doi: 10.1111/j.1502-3931.1992.tb01383.x.
- 604 29. Trueman, A.E. The ammonite body chamber, with special reference to the buoyancy and  
605 mode of life of the living ammonite. *Q J Geol Soc London.* 1941;96: 339–383. doi:  
606 10.1144/GSL.JGS.1940.096.01-04.14.
- 607 30. Tanabe, K., Obata, I., Futakami, M. Early shell morphology in some Upper Cretaceous  
608 heteromorph ammonites. *Trans Proc Palaeontol Soc Jpn.* 1981;124: 215-234.
- 609 31. Higashiura, K., Okamoto, T. Life orientation of heteromorph ammonites under the  
610 negatively buoyant condition: a case study on the *Eubostriochoceras muramotoi*  
611 Matsumoto. *Fossils.* 2012;92: 19-30.
- 612 32. Seilacher, A., Labarbera, M. Ammonites as cartesian divers. *Palaios.* 1995;10: 493-506.
- 613 33. Ward, P., Westermann, G. First Occurrence, Systematics, and Functional Morphology of  
614 *Nipponites* (Cretaceous Lytoceratina) from the Americas. *J Paleontol.* 1977;51: 367–372.
- 615 34. Klinger, H.C. Speculations on buoyancy control and ecology in some heteromorph  
616 ammonites. In: House, M.R., and Senior, J.R., (eds.) *The Ammonoidea. The Systematics*  
617 *Association, Special Volume No. 18; 1980. pp. 337-355.*
- 618 35. Okamoto, T. Changes in life orientation during the ontogeny of some heteromorph  
619 ammonoids. *Palaeontology.* 1988;31: 281-294.

- 620 36. Peterman, D.J., Ciampaglio, C., Shell, R.C., Yacobucci, M.M. Mode of life and  
621 hydrostatic stability of orthoconic ectocochleate cephalopods: hydrodynamic analyses of  
622 restoring moments from 3D-printed, neutrally buoyant models of a baculite. *Acta*  
623 *Palaeontol Pol.* 2019;64: 441-460. doi: 10.4202/app.00595.2019.
- 624 37. Peterman, D.J., Yacobucci, M.M., Larson, N.L., Ciampaglio, C.N., Linn, T. A method to  
625 the madness: ontogenetic changes in the hydrostatic properties of *Didymoceras*  
626 (*Nostoceratidae*, *Ammonoidea*). *Paleobiology*. 2020; forthcoming. doi:  
627 10.1017/pab.2020.14.
- 628 38. Peterman, D.J., Hebdon, N., Ciampaglio, C.N., Yacobucci, M.M., Landman, N.H., Linn,  
629 T. Syn vivo hydrostatic and hydrodynamic properties of scaphitid ammonoids from the  
630 U.S. Western Interior. *Geobios*. 2020; forthcoming. doi: 10.1016/j.geobios.2020.04.004.
- 631 39. Peterman, D.J., Shell, R.C., Ciampaglio, C.N., Yacobucci, M.M. Stable hooks:  
632 biomechanics of heteromorph ammonoids with U-shaped body chambers. *J Molluscan*  
633 *Stud.* 2020; forthcoming.
- 634 40. Peterman, D.J., Barton, C.C., Yacobucci, M.M. The hydrostatics of Paleozoic  
635 ectocochleate cephalopods (*Nautiloidea* and *Endoceratoidea*) with implications for modes  
636 of life and early colonization of the pelagic zone. *Palaeontol Electron.* 2019;22.2.27A: 1-  
637 29. doi: 10.26879/884.
- 638 41. Hoffmann, R., Lemanis, R., Naglik, C., Klug, C. Ammonoid Buoyancy. In: Klug, C.,  
639 Korn, D., De Baets, K., Kruta, I., Mapes, R.H. (eds.), *Ammonoid Paleobiology. Volume*  
640 *I: From Anatomy to Ecology. Topics in Geobiology.* 2015;43: 611-648.
- 641 42. Monks, N., and Young, J.R. Body position and the functional morphology of Cretaceous  
642 heteromorph ammonites. *Paleontol Electron.* 1998;1: 1-15. doi: 10.26879/98001.

- 643 43. Kaplan, P. Biomechanics as a test of functional plausibility: testing the adaptive value of  
644 terminal-countdown heteromorphy in Cretaceous Ammonoids. *Jahrb Geol Bundesanst.*  
645 2002;57: 751-763.
- 646 44. Lukeneder, A. Ammonoid Habitats and Life History. in: Klug, C., Korn, D., De Baets,  
647 K., Kruta, I., Mapes, R.H. (eds.) *Ammonoid paleobiology, volume I: from anatomy to*  
648 *ecology. Topics in geobiology.* 2015;43: 689-791.
- 649 45. Hoffmann, R., Slattery, J., Kruta, I., Linzmeier, B., Lemanis, R.E., Mironenko, A., et al.  
650 Recent advances in heteromorph ammonoid paleobiology. *Biol Rev.* 2020; **in review**.
- 651 46. Raup, D.M., Chamberlain, J.A. Equations for volume and center of gravity in ammonoid  
652 shells. *J Paleontol.* 1967;41: 566-574.
- 653 47. Saunders, W.B., Shapiro, E.A. Calculation and simulation of ammonoid hydrostatics.  
654 *Paleobiology.* 1986;12: 64-79. doi: 10.1017/S0094837300002980.
- 655 48. Klug, C., Korn, D. The origin of ammonoid locomotion. *Acta Palaeontol Pol.* 2004;49:  
656 235-242.
- 657 49. Naglik, C., Tajika, A., Chamberlain, J., Klug, C. Ammonoid locomotion. in: Klug, C.  
658 Korn, D., De Baets, K., Kruta, I., Mapes, R. (eds.) *Ammonoid Paleobiology. From*  
659 *anatomy to ecology, Topics in Geobiology.* 2015;43: 649-688.
- 660 50. Chamberlain, J.A. Hydromechanical design of fossil cephalopods. In House, M.R., and  
661 Senior, J.R. (eds.), *The Ammonoidea*, Systematics Association, London. 1981. pp. 289-  
662 336.
- 663 51. Morón-Alfonso, D.A. Exploring the paleobiology of ammonoids (Cretaceous, Antarctica)  
664 using non-invasive imaging methods. *Palaeontol Electron.* 2019;22.3.57. doi:  
665 10.26879/1007.

- 666 52. Hoffmann, R., Lemanis, R.E., Falkenberg, J., Schneider, S., Wesendonk, H., Zachow, S.  
667 Integrating 2D and 3D shell morphology to disentangle the paleobiology of ammonoids:  
668 a virtual approach. *Palaeontology*. 2018;61: 89–104. doi: 10.1111/pala.12328
- 669 53. Hoffmann, R., Schultz, J.A., Schellhorn, R., Rybacki, E., Keupp, H., Gerden, et al. Non-  
670 invasive imaging methods applied to neo- and paleo-ontological cephalopod research.  
671 *Biogeosciences*. 2014;11: 2721-2739. doi: 10.5194/bg-11-2721-2014
- 672 54. Lemanis, R., Zachow, S., Füsseis, F., Hoffmann, R. A new approach using high-  
673 resolution computed tomography to test the buoyant properties of chambered cephalopod  
674 shells. *Paleobiology*. 2015;41: 313-329. DOI:10.1017/pab.2014.17.
- 675 55. Lemanis, R., Korn, D., Zachow, S., Rybacki, E., Hoffmann, R. The evolution and  
676 development of cephalopod chambers and their shape. *PLoS One*. 2016;11: 1-21. doi:  
677 10.1371/journal.pone.0151404.
- 678 56. Tajika, A., Naglik, C., Morimoto, N., Pascual-Cebrian, E., Hennhofer, D., Klug, C.  
679 Empirical 3D model of the conch of the Middle Jurassic ammonite microconch  
680 *Normannites*: its buoyancy, the physical effects of its mature modifications and  
681 speculations on their function. *Hist Biol*. 2015;27: 181–191. doi:  
682 10.1080/08912963.2013.872097.
- 683 57. Naglik, C., Monnet, C., Goetz, S., Kolb, C., De Baets, K., Tajika, A., et al. Growth  
684 trajectories of some major ammonoid sub-clades revealed by serial grinding tomography  
685 data. *Lethaia*. 2015;48: 29-46. doi:10.1111/let.12085
- 686 58. Naglik, C., Rikhtegar, F., Klug, C. Buoyancy of some Palaeozoic ammonoids and their  
687 hydrostatic properties based on empirical 3D-models. *Lethaia*. 2016;49: 3-12. doi:  
688 10.1111/let.12125.

- 689 59. Inoue, S., Kondo, S. Suture pattern formation in ammonites and the unknown rear mantle  
690 structure. *Sci Rep.* 2016;6: 33689. doi: 10.1038/srep33689.
- 691 60. Palaeontological Society of Japan, 2019, Digital references of computerized tomography  
692 of Nipponites. Available at <http://www.palaeo-soc-japan.jp/3d-ammonoids/>. Downloaded  
693 January 29, 2020.
- 694 61. Raup, D.M. Geometric analysis of shell coiling: coiling in ammonoids. *J Paleontol.*  
695 1967;41: 43-65.
- 696 62. White Rabbit Co., Ltd. Molcer 1.51. White Rabbit Co., Ltd., Toshima, Tokyo, Japan;  
697 2019.
- 698 63. Autodesk Inc. Meshmixer 3.3. Autodesk Inc., San Rafael, California; 2017a.
- 699 64. Blender Online Community. Blender, a 3D modelling and rendering package. Blender  
700 Institute, Amsterdam. <http://www.blender.org>; 2017.
- 701 65. Autodesk Inc. Netfabb 2017.3. Autodesk Inc., San Rafael, California; 2017b.
- 702 66. Peterman, D.J. Project: *Nipponites mirabilis* 3D models.  
703 [https://www.morphosource.org/Detail/MediaDetail/Show/media\\_id/64314](https://www.morphosource.org/Detail/MediaDetail/Show/media_id/64314). Last modified  
704 May 7, 2020. 2020.
- 705 67. Witmer, L. M. The extant phylogenetic bracket and the importance of reconstructing soft  
706 tissues in fossils. In: Thomason, J.J. (ed.) *Functional morphology in vertebrate*  
707 *paleontology*. Cambridge University Press, Cambridge; 1995. pp. 19-32.
- 708 68. Jacobs, D.K., Landman, N.H. Nautilus – a poor model for the function and behavior of  
709 ammonoids? *Lethaia.* 1993;26: 1-12. doi: 10.1111/j.1502-3931.1993.tb01799.x



- 710 69. Klug, C., Riegraf, W., Lehmann, J. Soft-part preservation in heteromorph ammonites  
711 from the Cenomanian-Turonian Boundary Event (OAE 2) in the Teutoburger Wald  
712 (Germany). *Palaeontology*. 2012;55: 1307-1331. doi: 10.1111/j.1475-4983.2012.01196.x
- 713 70. Klug, C., Lehmann, J. Soft Part Anatomy of Ammonoids: Reconstructing the Animal  
714 Based on Exceptionally Preserved Specimens and Actualistic Comparisons. In: Klug, C.,  
715 Korn, D., De Baets, K., Kruta, I., Mapes, R.H., (eds.) *Ammonoid paleobiology, volume I:*  
716 *from anatomy to ecology*. *Topics in geobiology*. 2015;43: 515-538.
- 717 71. Landman, N.H., Cobban, W.A., Larson, N.L. Mode of life and habit of scaphitid  
718 ammonites. *Geobios*. 2012;45: 87-98.
- 719 72. Peterman, D.J., Barton, C.C. Power scaling of ammonitic suture patterns from Cretaceous  
720 *Ancyloceratina*: constraints on septal/sutural complexity. *Lethaia*. 2019;52: 77-90, doi:  
721 10.1111/let.1229.
- 722 73. Hoffmann, R., Zachow, S. 2011: Non-invasive approach to shed new light on the  
723 buoyancy business of chambered cephalopods (Mollusca). IAMG 2011 publication,  
724 Salzburg. doi: 10.5242/iamg.2011.0163:506-516
- 725 74. Greenwald, L., Ward, P.D. Buoyancy in *Nautilus*. In: Saunders, B.W., Landman, N.H.,  
726 (eds.) *Nautilus—the biology and paleobiology of a living fossil*. Springer, Dordrecht;  
727 1987.
- 728 75. Cignoni, P., Ranzuglia, G. MeshLab (Version 1.3.3) [Computer graphics software].  
729 Visual Computing Lab – ISTI – CNR Pisa, Italy. Available from  
730 <http://meshlab.sourceforge.net/>; 2014.
- 731 76. Ward, P. Functional morphology of Cretaceous helically-coiled ammonite shells.  
732 *Paleobiology*. 1979;5: 415-422. doi: 10.1017/S0094837300016912.

- 733 77. Kruta, I., Landman, N.H., Rouget, I., Cecca, F., Larson, N.L. The jaw apparatus of the  
734 Late Cretaceous ammonite *Didymoceras*. J Paleontol. 2010;84: 556-560. doi: 10.1666/09-  
735 110.1
- 736 78. Okamoto, T. Comparative morphology of *Nipponites* and *Eubostriochoceras* (Cretaceous  
737 Nostoceratids). Trans Proc Palaeontol Soc Jpn. 1989;154: 117-139. doi:  
738 10.14825/prpsj1951.1989.154\_117.
- 739 79. Mikhailova, I.A., Baraboshkin, E.Y., The Evolution of the Heteromorph and Monomorph  
740 Early Cretaceous Ammonites of the Suborder Ancyloceratina Wiedmann. Paleontol J.  
741 2009;43: 527-536.
- 742 80. Seilacher, A. Patterns of macroevolution through the Phanerozoic. Palaeontology.  
743 2013;56: 1273-1283.
- 744 81. Landman, N.H., Goolaerts, S., Jagt, J.W.M, Jagt-Yazykova, E.A., Machalski, M.  
745 Ammonites on the brink of extinction: diversity, abundance, and ecology of the Order  
746 Ammonoidea at the Cretaceous-Paleogene (K/Pg) boundary. In Klug, C., Korn, D., De  
747 Baets, K., Kruta, I., Mapes, R.H., (eds.) Ammonoid Paleobiology: From macroevolution  
748 to paleogeography. Topics in Geobiology. 2015;43: 497-553.
- 749 82. Packard, A. Cephalopods and fish: the limits of convergence. Biol Rev. 1972;47: 241-  
750 307. doi: 10.1111/j.1469-185X.1972.tb00975.x

751

## 752 **Figure and Table Captions**

753 **Fig 1. Hydrostatic Metrics used for *Nipponites mirabilis*.** A, Side view of *Nipponites* in life  
754 position showing hypothetical centers of buoyancy (B), mass (M), and the horizontal axis of  
755 rotation (R). The angle of the aperture ( $\theta_a$ ) is measured as the inclination from the vertical plane.

756 The thrust angle ( $\theta_t$ ) can be used to assess the directional efficiency of movement. This angle is  
757 measured between the horizontal plane, and a line passing through R and the location of the  
758 hyponome (source of thrust; H). **B**, Front view of *Nipponites* in life position facing the aperture.  
759 This view shows the total lever arm (L) and its x-component ( $L_x$ ) which is proportionate to the  
760 amount of rotational movement about the vertical axis produced during jet propulsion. **C**, Top  
761 view of *Nipponites* in life position showing the rotational thrust angle ( $\theta_{tr}$ ). This angle is  
762 measured between the vertical rotation axis (vert.), which passes through B and M, and the  
763 direction of the thrust vector (arrow emanating from H). Rotational thrust angles of  $90^\circ$  result in  
764 idealized transmission of thrust into pure rotation.

765 **Fig 2. Virtual Reconstruction of the Shell of *Nipponites mirabilis*.** **A**, Tessellated (.stl) 3D  
766 model generated from a CT scan [60] of specimen INM-4-346. **B**, Reconstructed adoral portion  
767 of the body chamber and inner criocone phase with arrays algorithms (Table 1). **C**, Extruded  
768 septa generated from the suture pattern. **D**, Extruded shell and septa models unified together to  
769 produce a single, manifold 3D mesh of the entire shell.

770 **Fig 3. Thickness Measurements used for Virtual Model Extrusion.** Thicknesses of the shell  
771 (black) and septa (grey) as a function of whorl height. Measurements were recorded from  
772 specimen NMNS PM35490 and used to define thickness in the virtual model.

773 **Fig 4. Specimens Used for Shell Reconstruction.** **A**, Original concretion containing NMNS  
774 PM35490 Umbilical view (**B**) and ventral view (**C**) of the shell section used to record the suture  
775 pattern (**D**). **E**, 3D scan of the Mikasa City Museum Specimen (MCM-A0435) used to  
776 approximate the body chamber ratio. Scale bar = 2 cm.

777 **Fig 5. Final hydrostatic models of the first eight ontogenetic stages (A-H) of *Nipponites***  
778 ***mirabilis*.** All models are oriented so that their ventral apertures face towards the right. The tip of

779 the upper cone corresponds to the center of buoyancy while the tip of the lower cone is the center  
780 of mass. These two centers are vertically aligned, denoting the proper static orientation assumed  
781 by living *Nipponites mirabilis*.

782 **Fig 6. Final hydrostatic models of the last six ontogenetic stages (A-F) of *Nipponites***

783 *mirabilis*. All models are oriented so that their ventral apertures face towards the right. The tip of  
784 the upper cone corresponds to the center of buoyancy while the tip of the lower cone is the center  
785 of mass. These two centers are vertically aligned, denoting the proper static orientation assumed  
786 by living *Nipponites mirabilis*.

787 **Fig 7. Hydrostatic Properties Computed Throughout Ontogeny.** The proportion of the  
788 phragmocone to be emptied of cameral liquid for neutral buoyancy ( $\Phi$ ; circles), hydrostatic  
789 stability index ( $S_t$ ; squares), and apertural angles ( $\theta_a$ ; triangles) as a function of age (proxied by  
790 the curvilinear length for that stage normalized by the curvilinear length of the terminal  
791 specimen). Dashed lines are interpolated between the 14 measured stages.

792 **Fig 8. The Influence of Rib Obliquity on Orientation.** Apertural angles with observed rib  
793 obliquity ( $\theta_a$ ; triangles) and the angles normal to the direction of shell growth (zero obliquity;  
794 circles) as a function of age (proxied by the curvilinear length for that stage normalized by the  
795 curvilinear length of the terminal specimen). Light grey shading and dark grey shading denote  
796 rib obliquity that boosts  $\theta_a$  in the upwards direction and downward directions, respectively.

797 **Fig 9. The Directional Efficiency of Movement.** Thrust angles in the vertical direction ( $\theta_t$ ;  
798 black dashed line), rotational thrust angles ( $\theta_{tr}$ ; grey dashed line), and lever arms as a function of  
799 age (proxied by the curvilinear length for that stage normalized by the curvilinear length of the  
800 terminal specimen). The total lever arm (grey solid line) and x-component of that lever arm (X  
801 Lever Arm; solid black line) are both normalized by the cube root of the volume of water

802 displaced ( $V_{wd}$ ) for each stage. Idealized rotation would take place with high, relative x-  
803 components of the lever arm and  $\theta_{tr}$  of  $90^\circ$ . Idealized horizontal movement would occur with  $\theta_t$   
804 of  $0^\circ$  and  $\theta_{tr}$  of  $0^\circ$  or  $180^\circ$ .

805 **Table 1.** Array instructions used to reconstruct the juvenile criocone phase and the adoral portion  
806 of the terminal body chamber. These arrays were used in a piecewise manner to replicate the  
807 whorl section from the adoral direction to adapical direction by translation, rotation, and scaling  
808 in the x, y, and z directions. Asterisks denote arrays that had their origins reset to their current  
809 locations before replication. If origins were not reset, the origins of their previous arrays were  
810 used.

811 **Table 2.** Hydrostatic properties computed for the 14 ontogenetic stages examined. Crio =  
812 criocone phase; Term = terminal phase; Age% = curvilinear length for that stage normalized by  
813 the curvilinear length of the terminal specimen; BC Ratio = curvilinear length of body chamber  
814 normalized by the total curvilinear length at a particular stage;  $\Phi$  = the proportion of the  
815 phragmocone to be emptied of liquid for a neutrally buoyant condition;  $S_t$  = hydrostatic stability  
816 index;  $\theta_a$  = apertural angle;  $\theta_{ao}$  = apertural orientation if rib obliquity was ignored (normal to  
817 shell growth direction);  $L$  = total lever arm;  $L_x$  = x-component of the lever arm, norm =  
818 normalized by the cube root of water displaced for each particular stage;  $\theta_t$  = thrust angle;  $\theta_{tr}$  =  
819 rotational thrust angle.

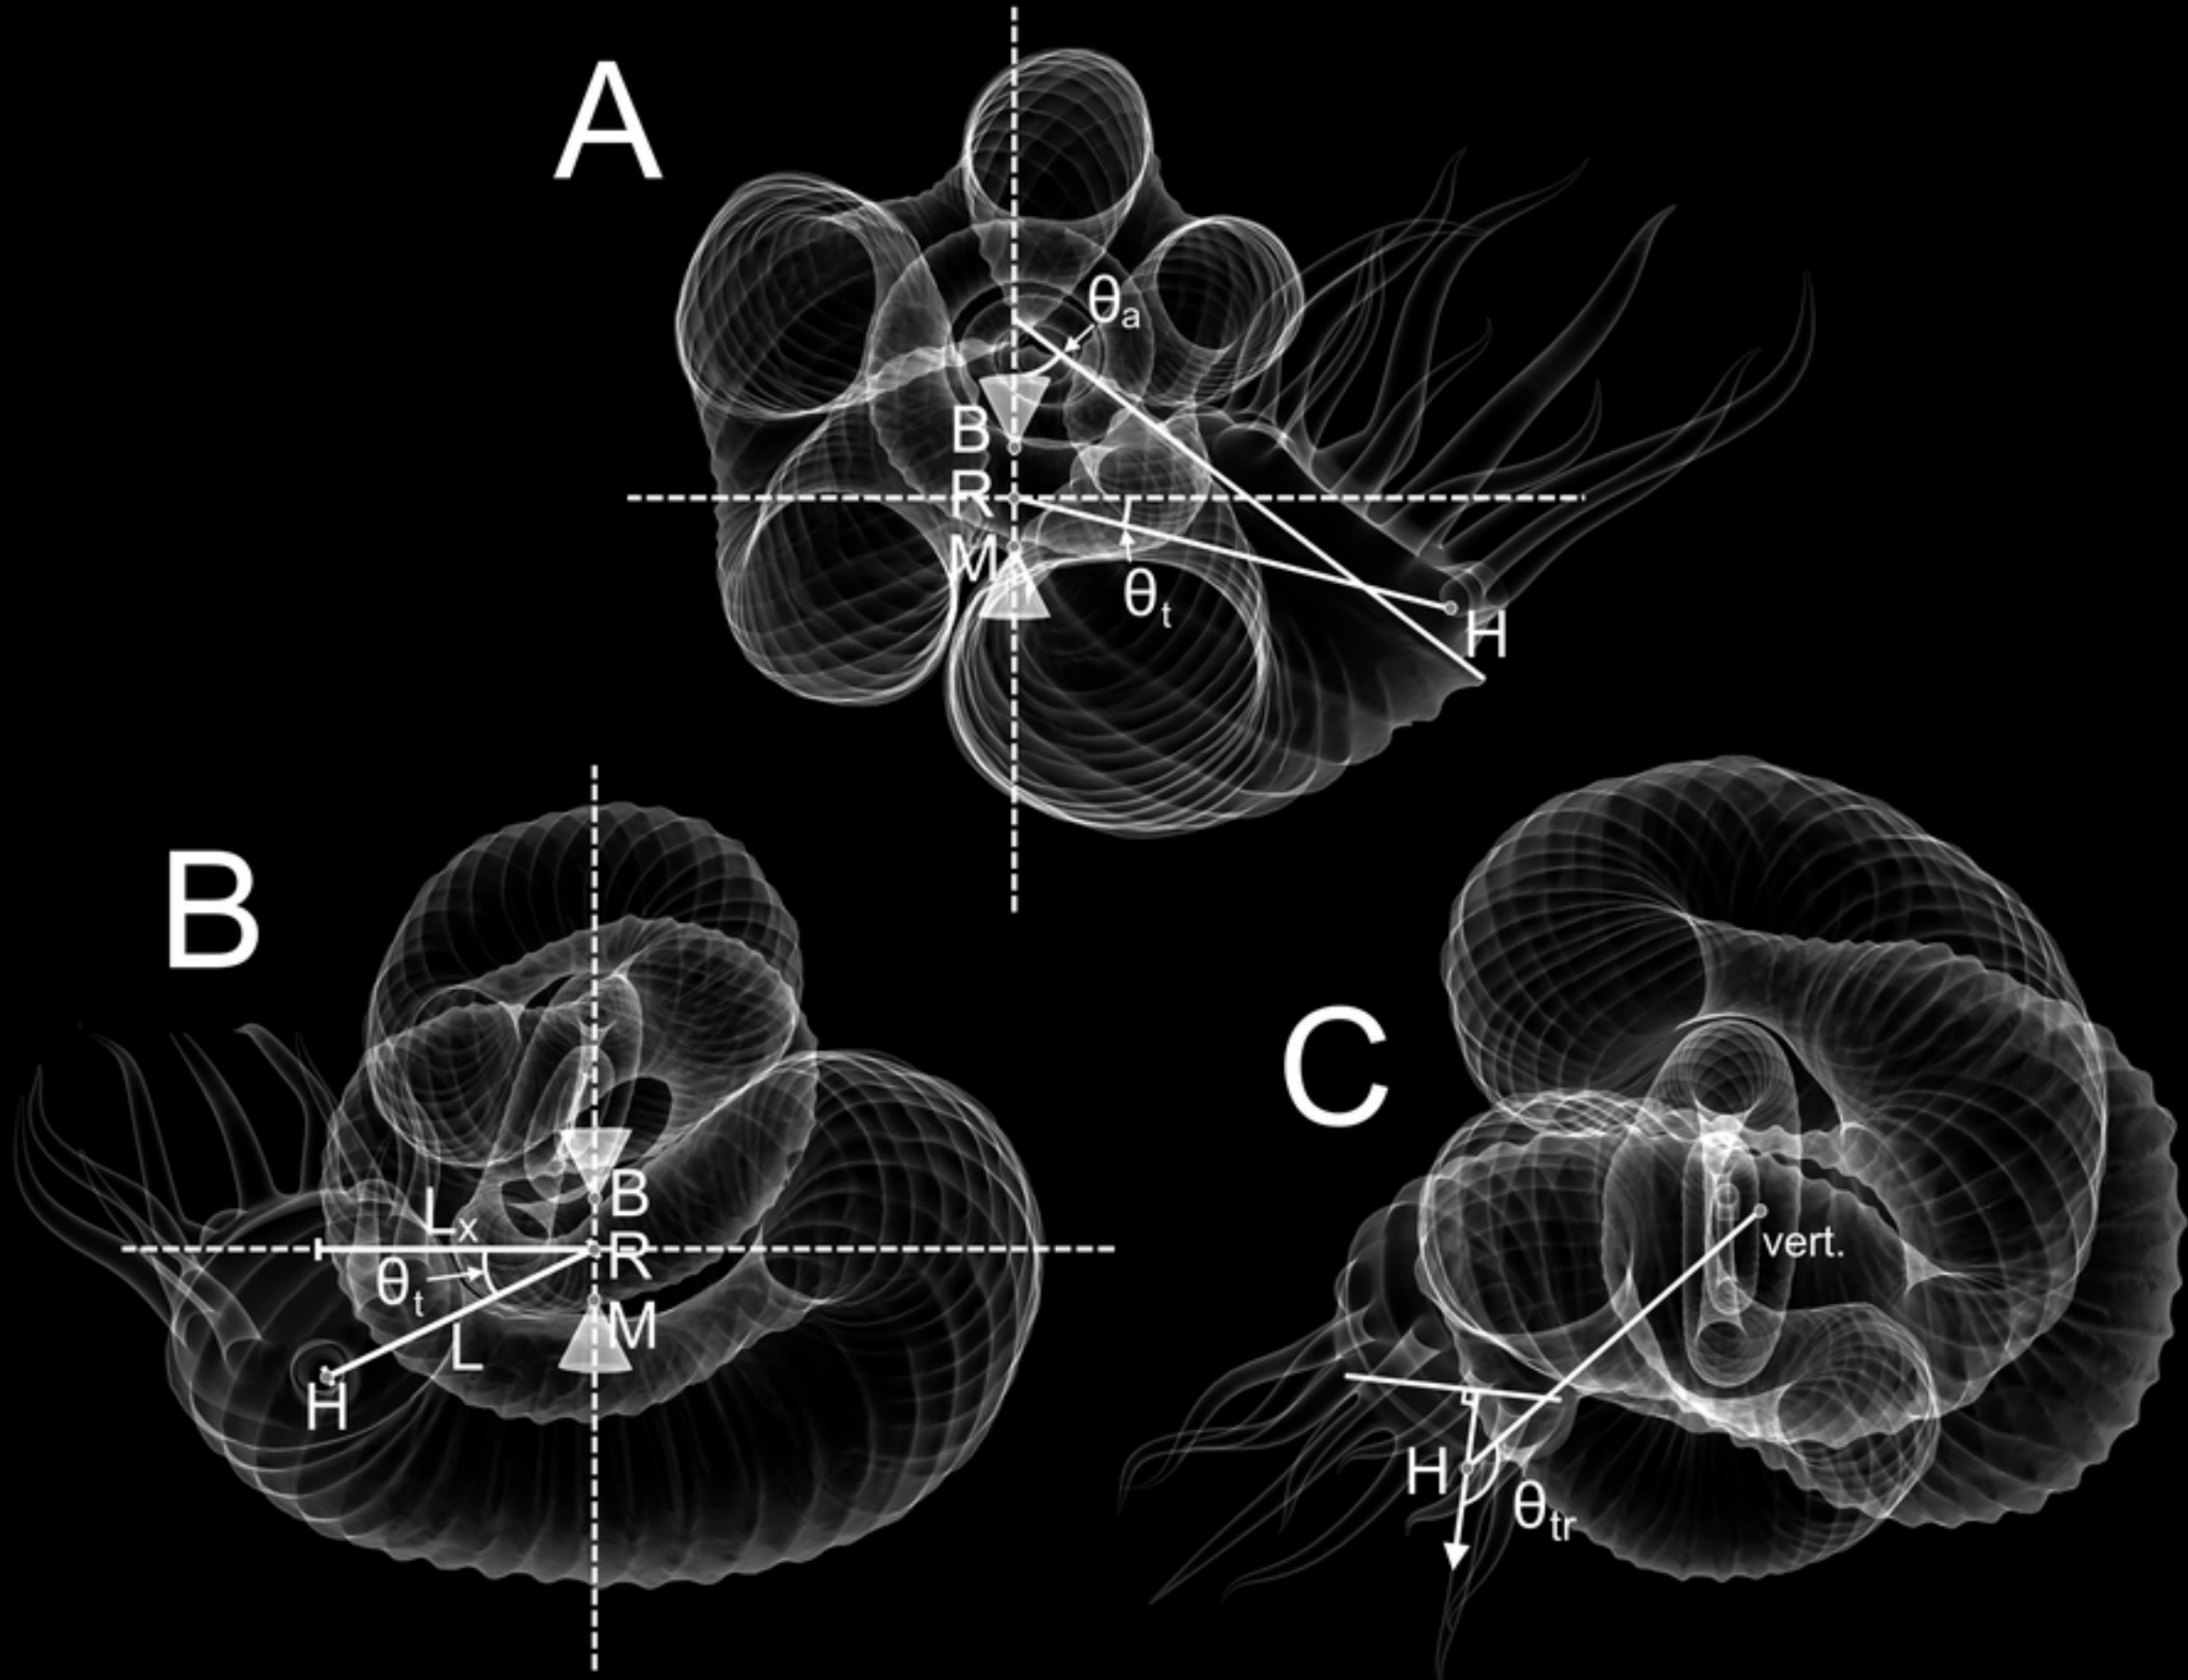

Figure 1



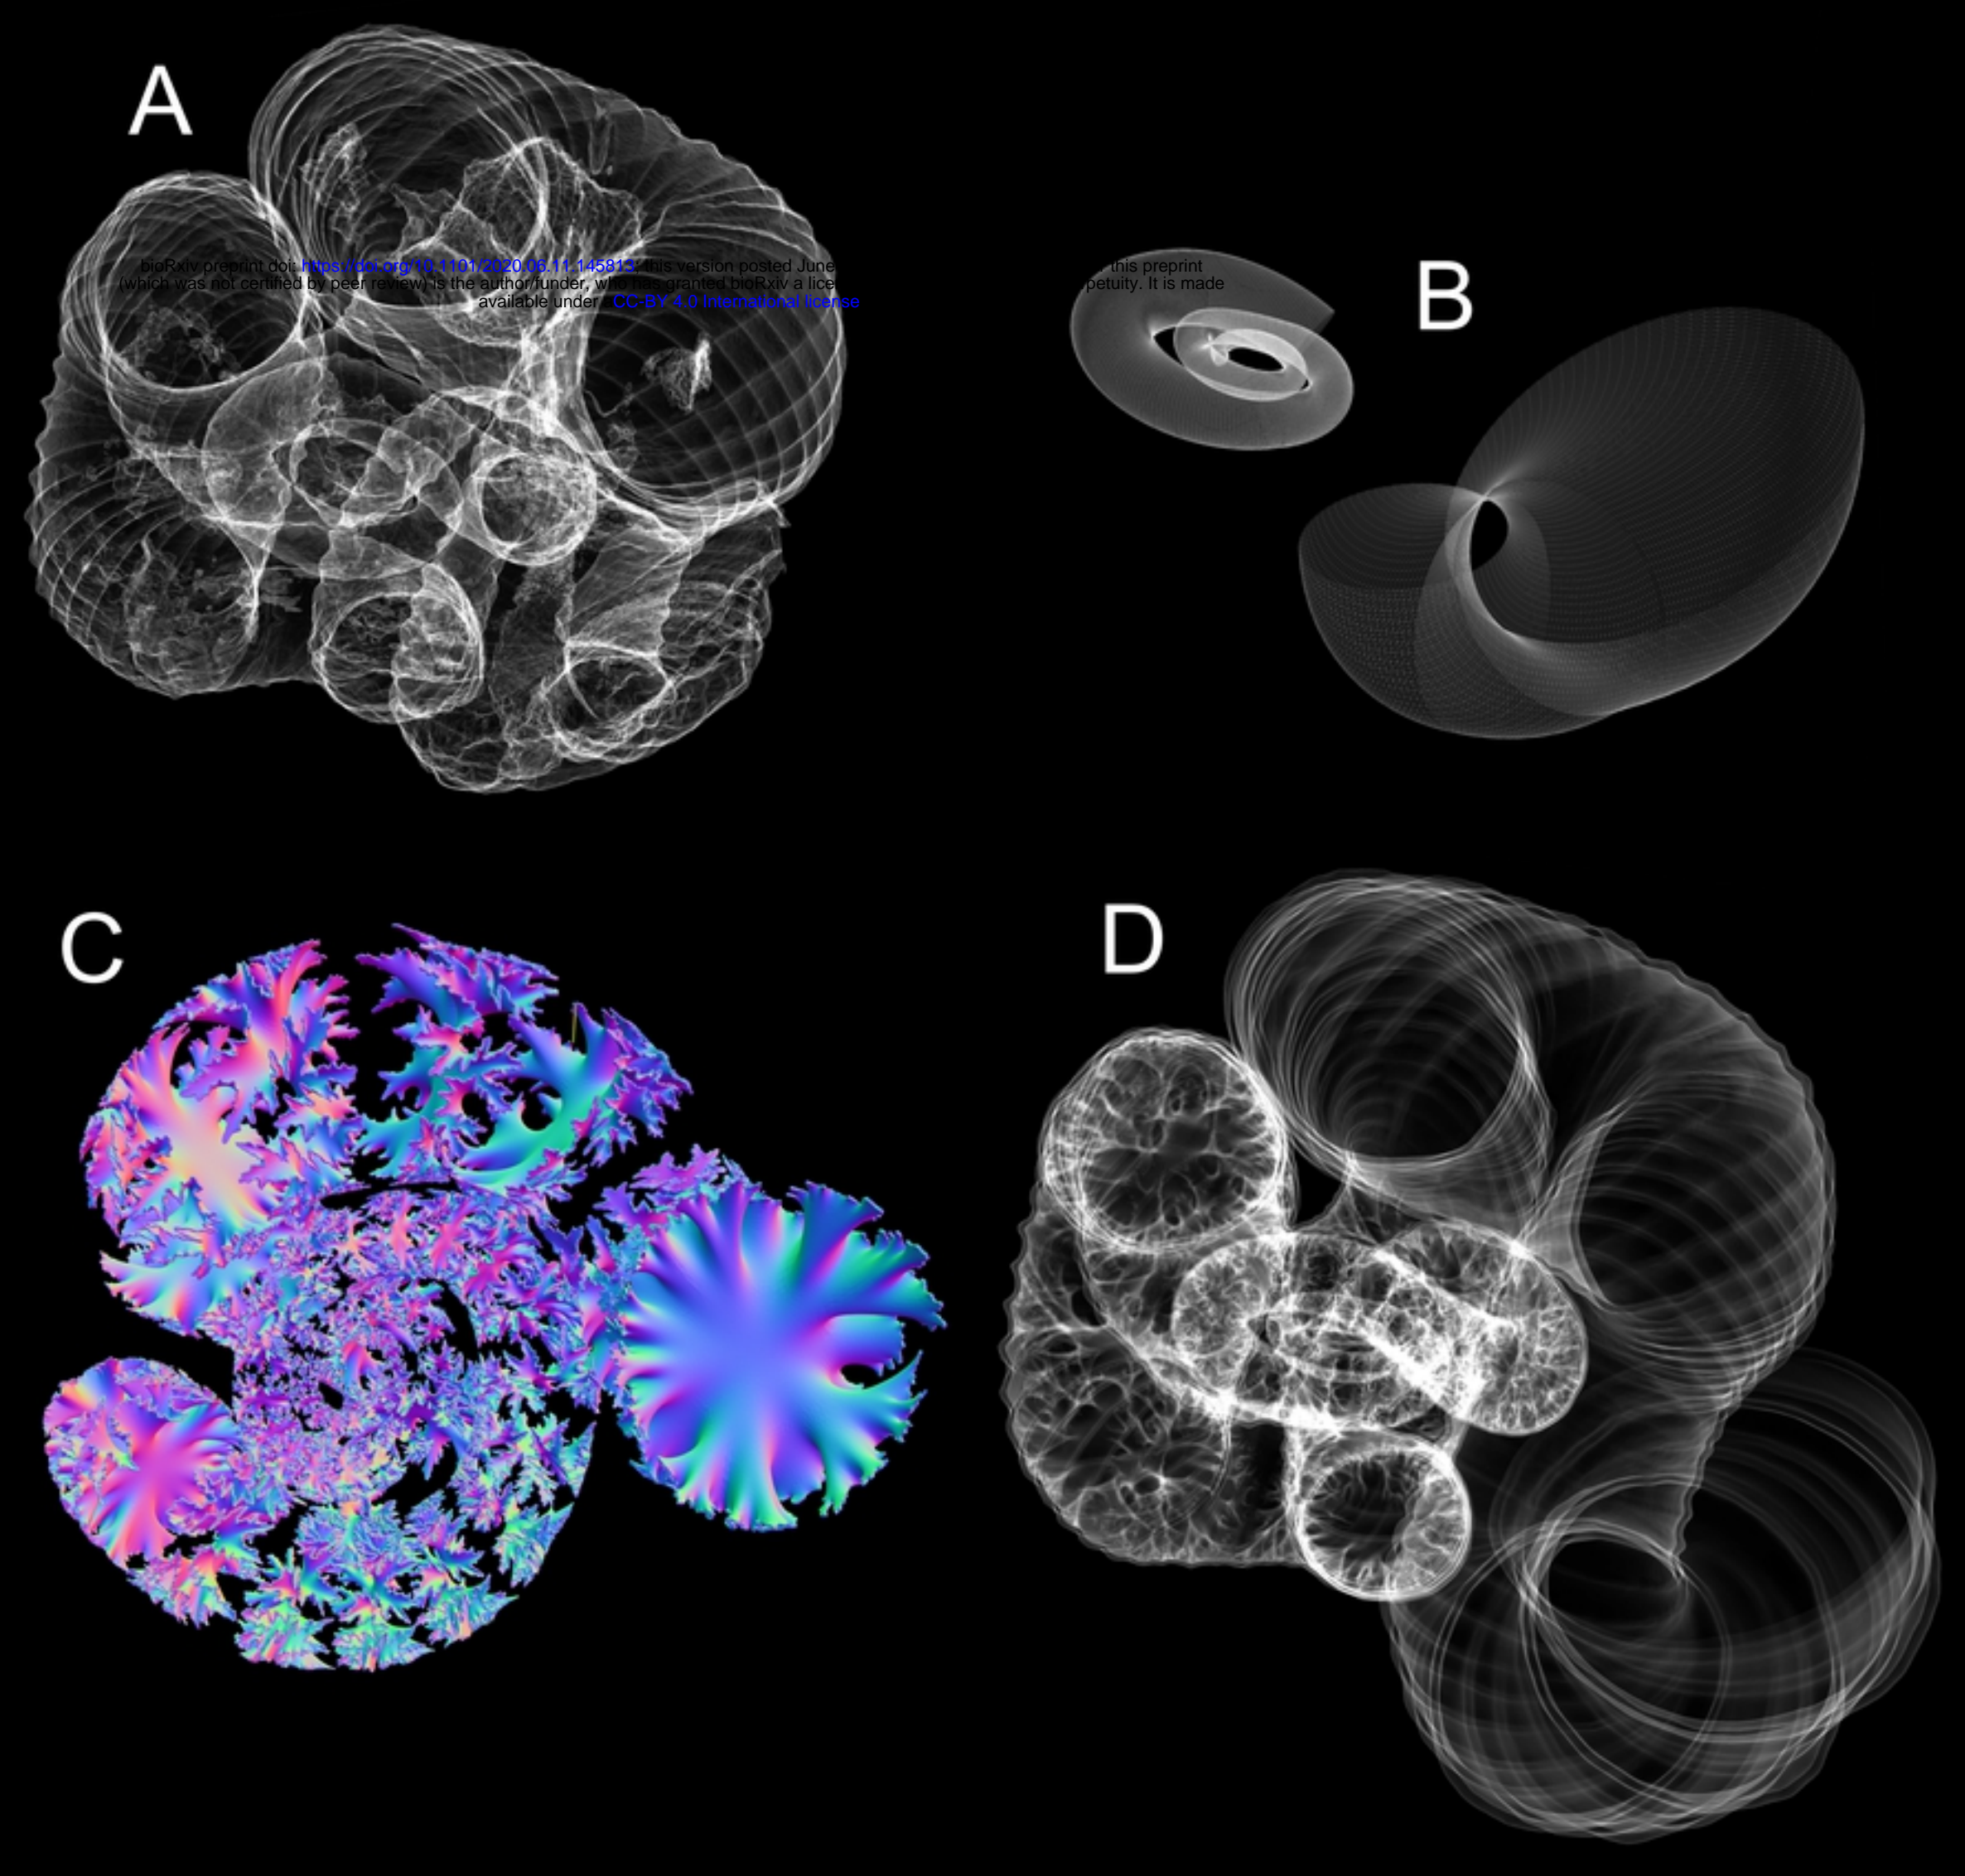

Figure 2

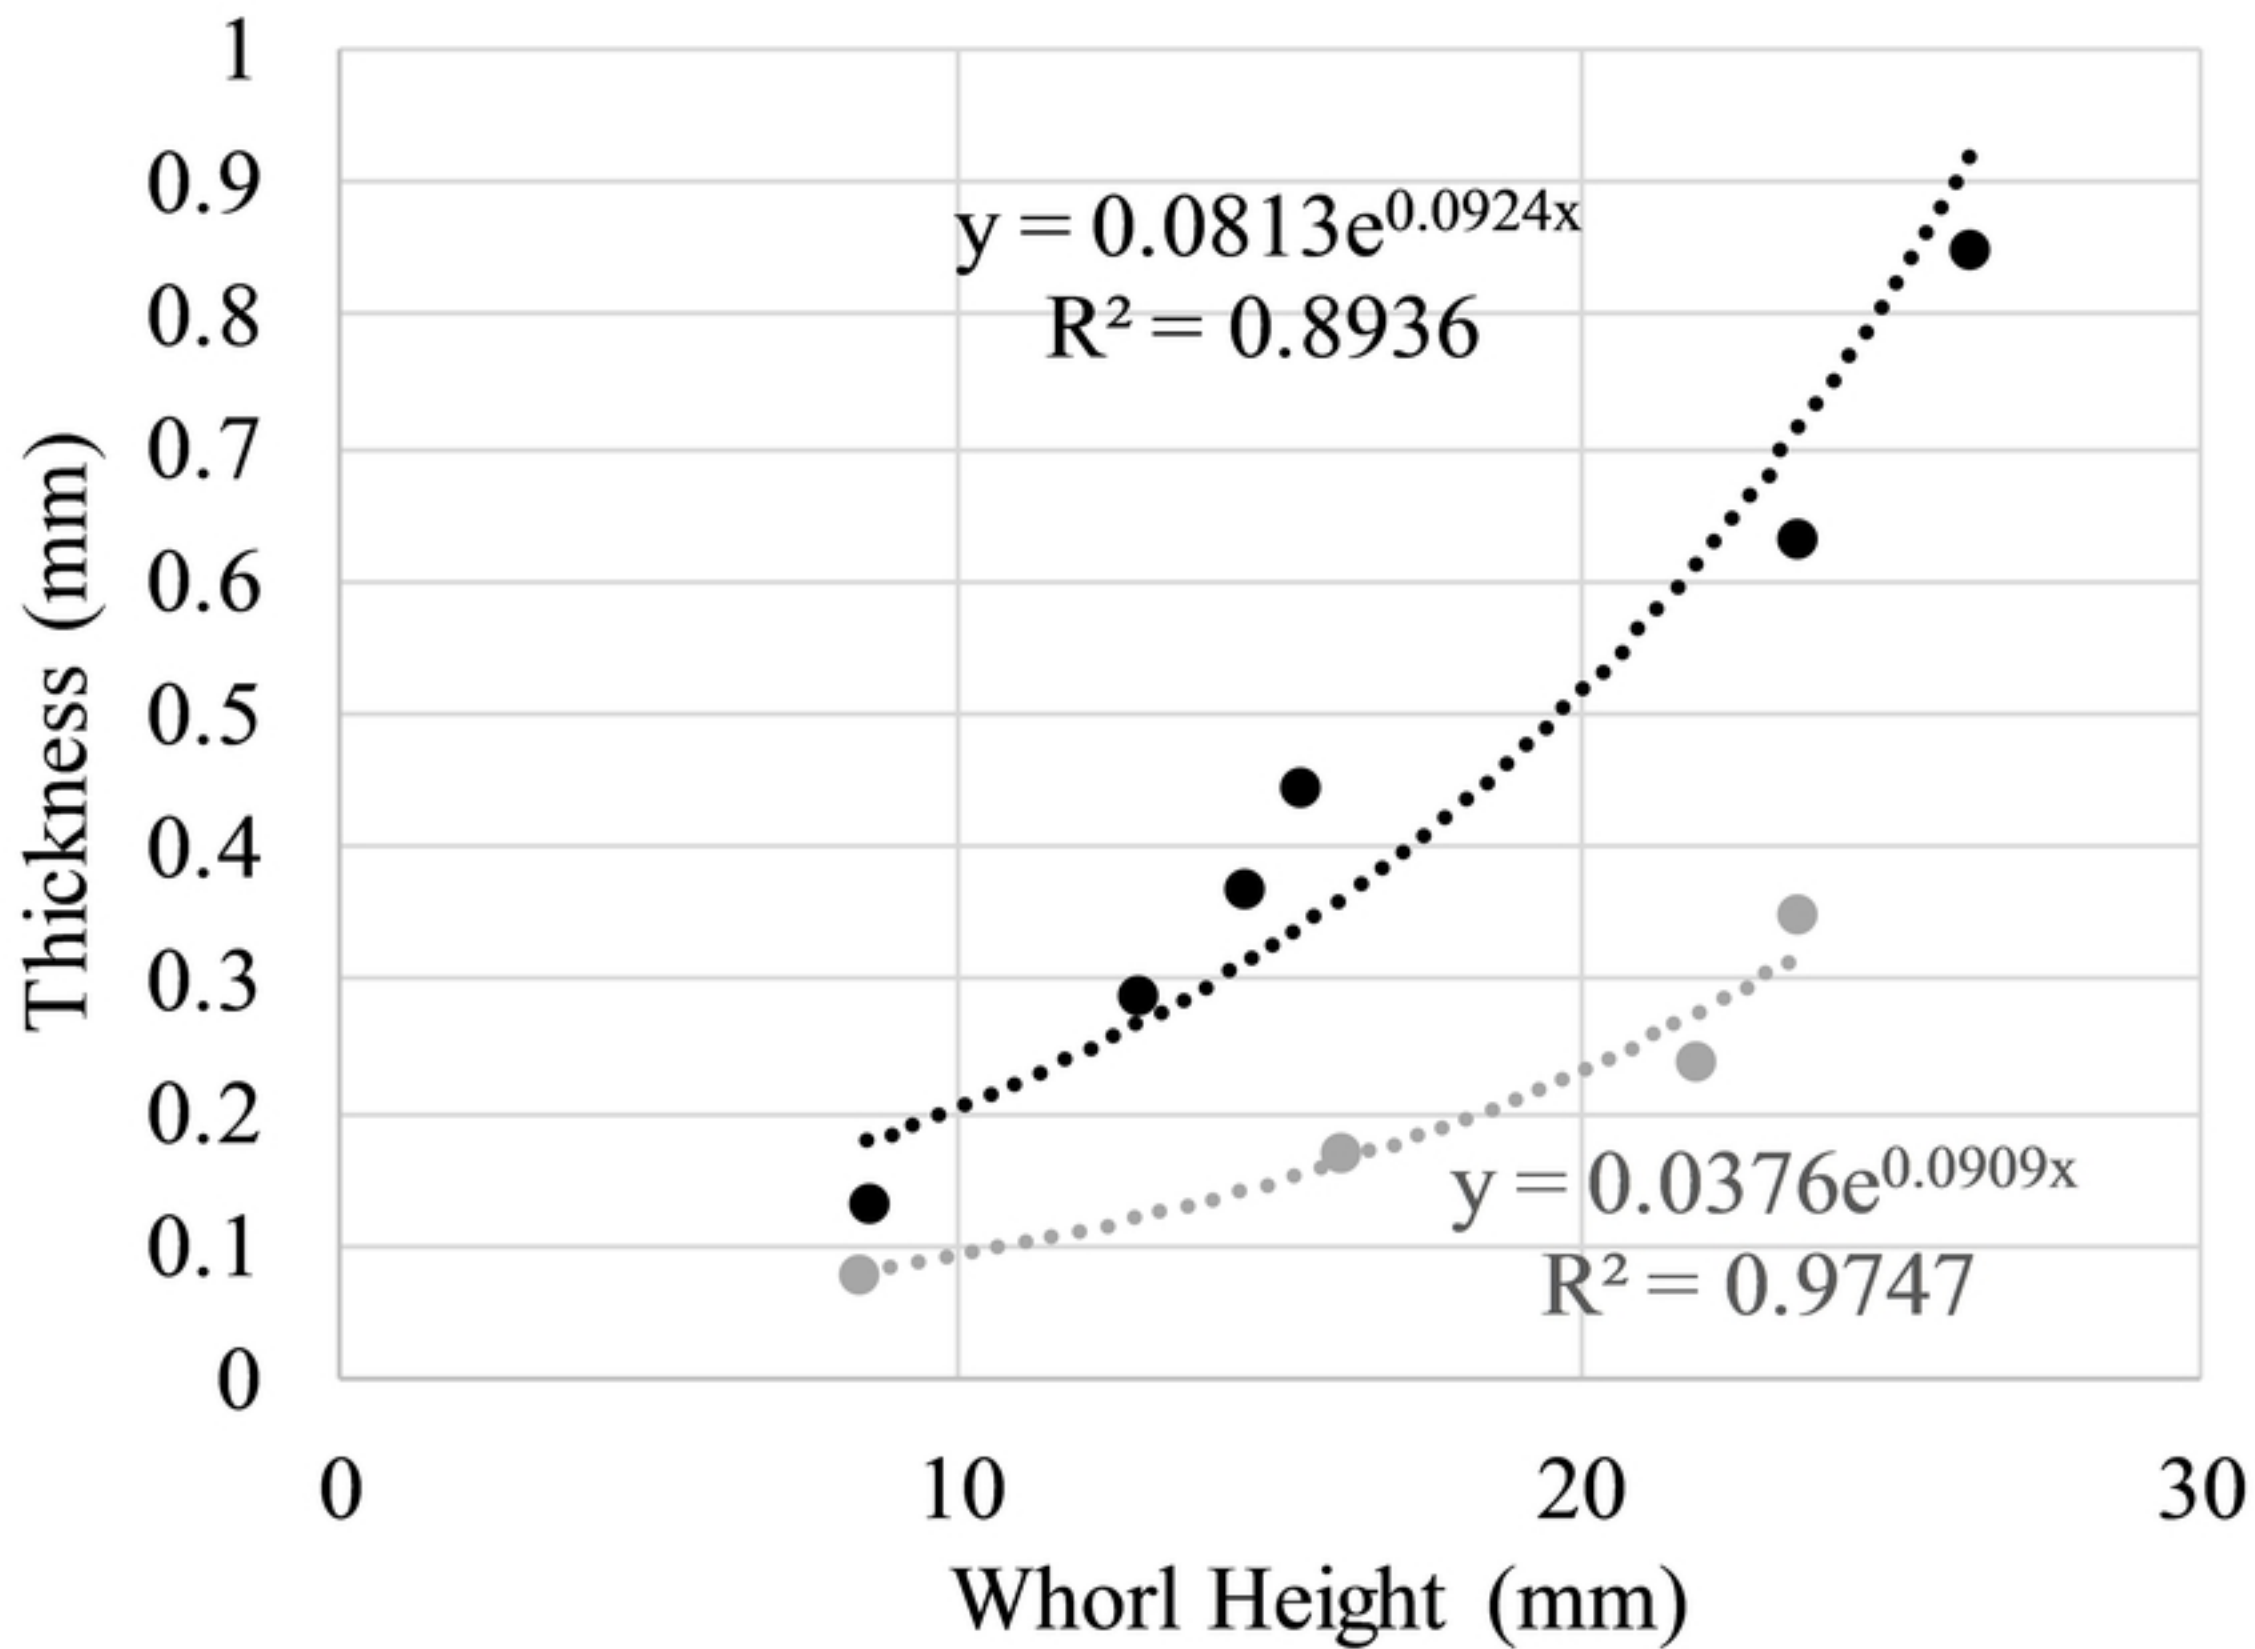

Figure 3



A

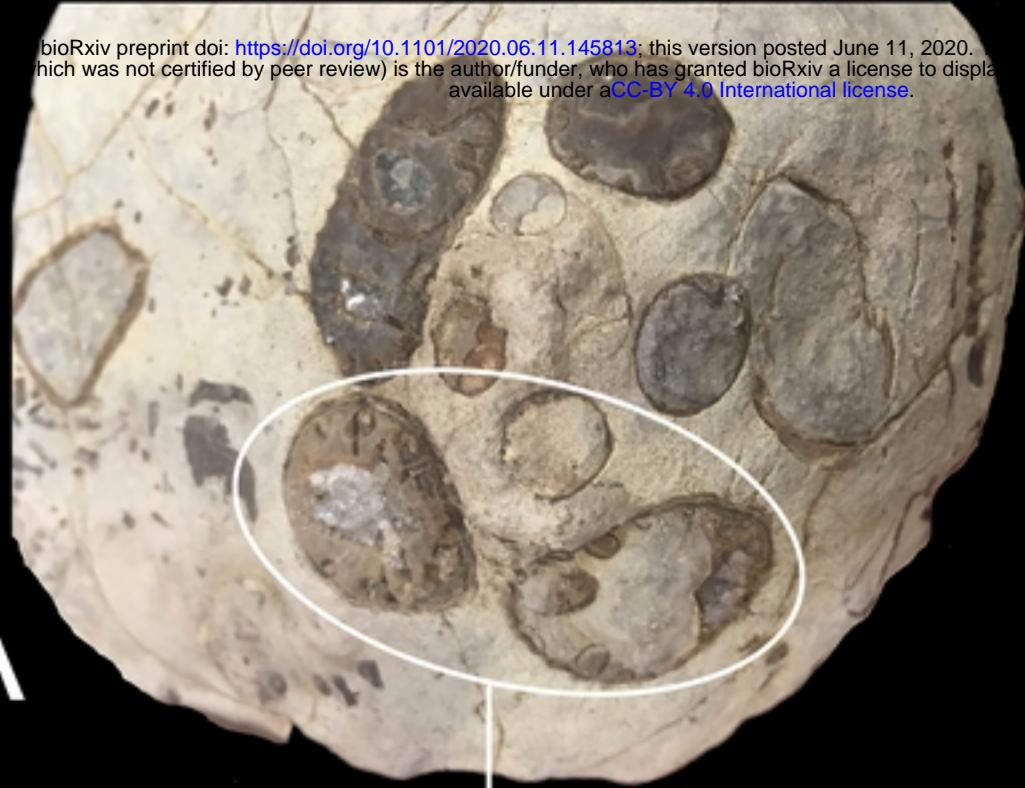

B

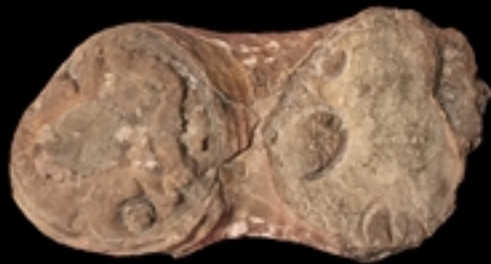

C

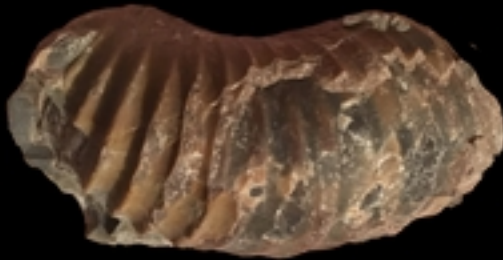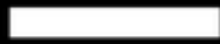

E

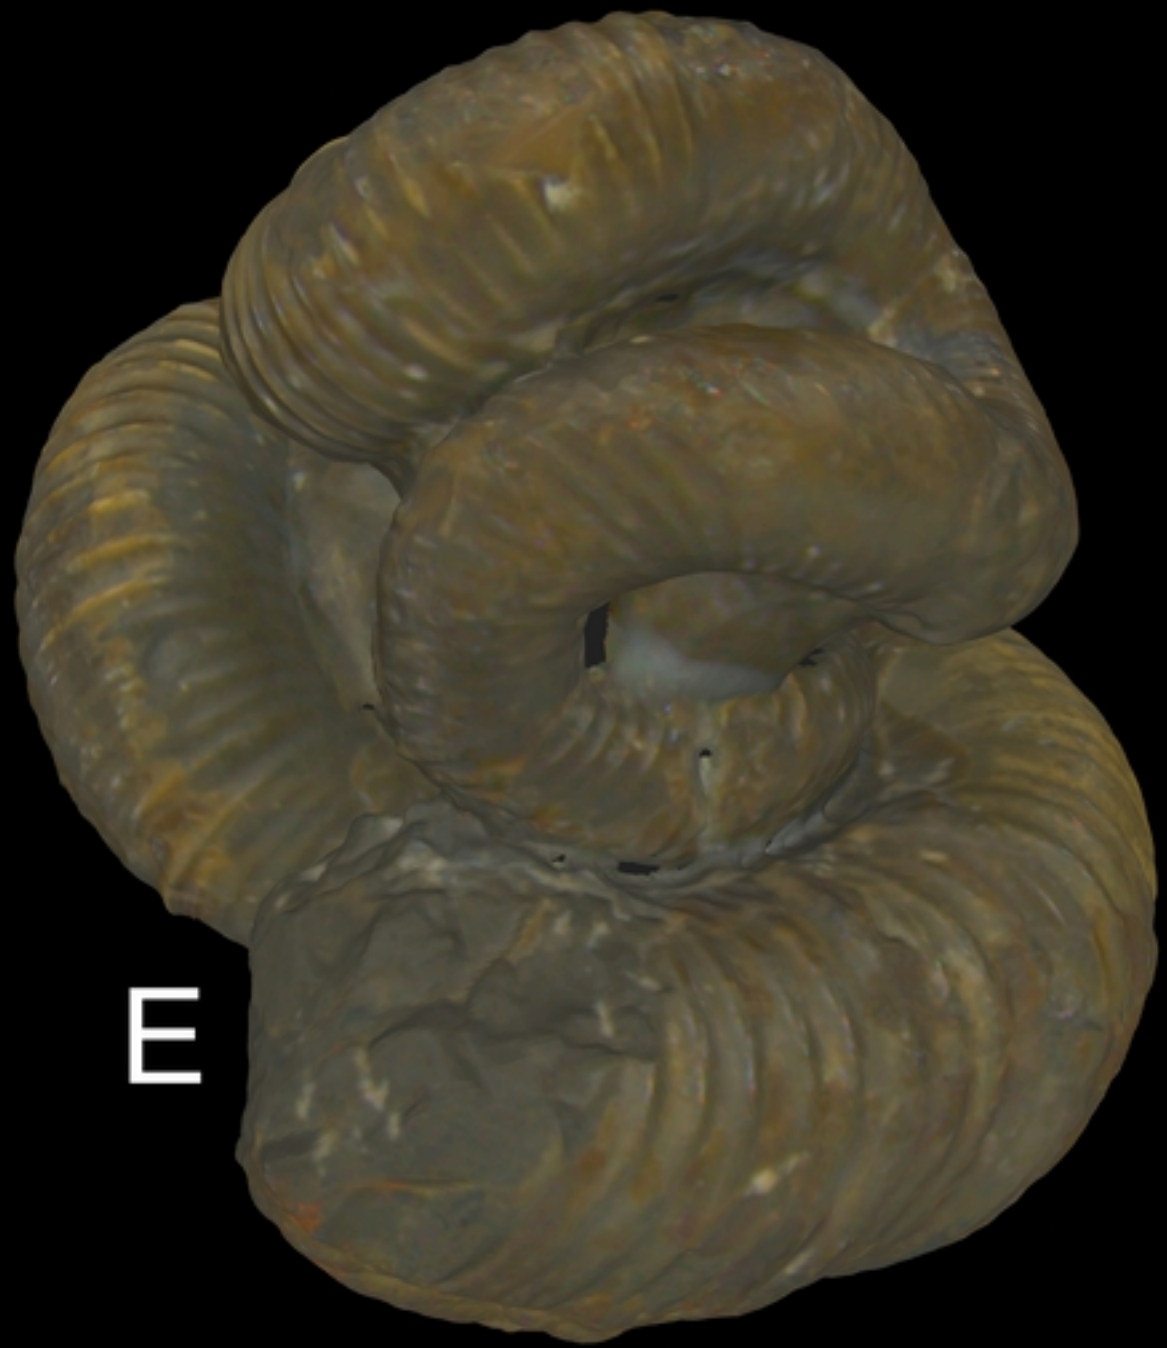

D

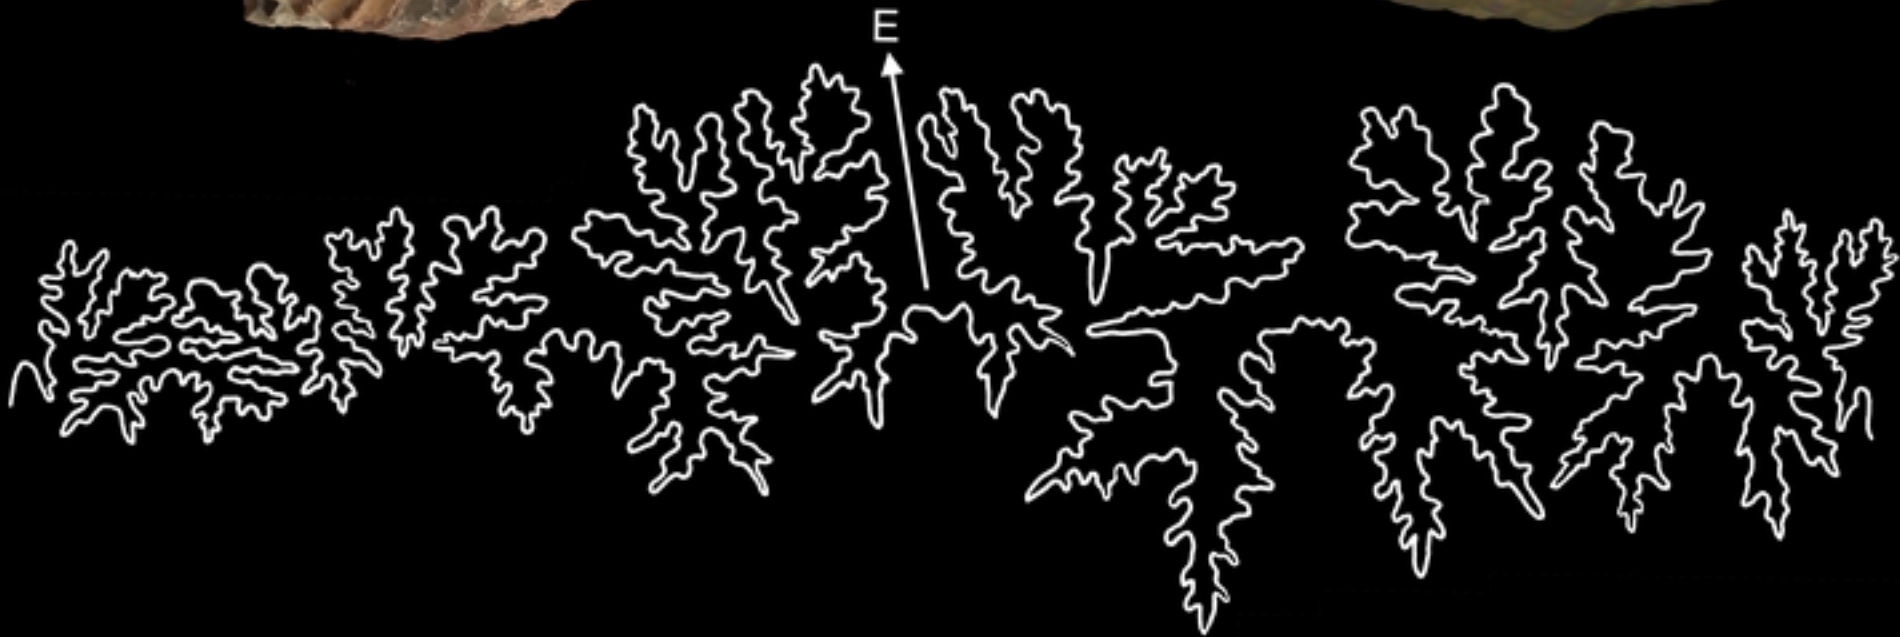

Figure 4



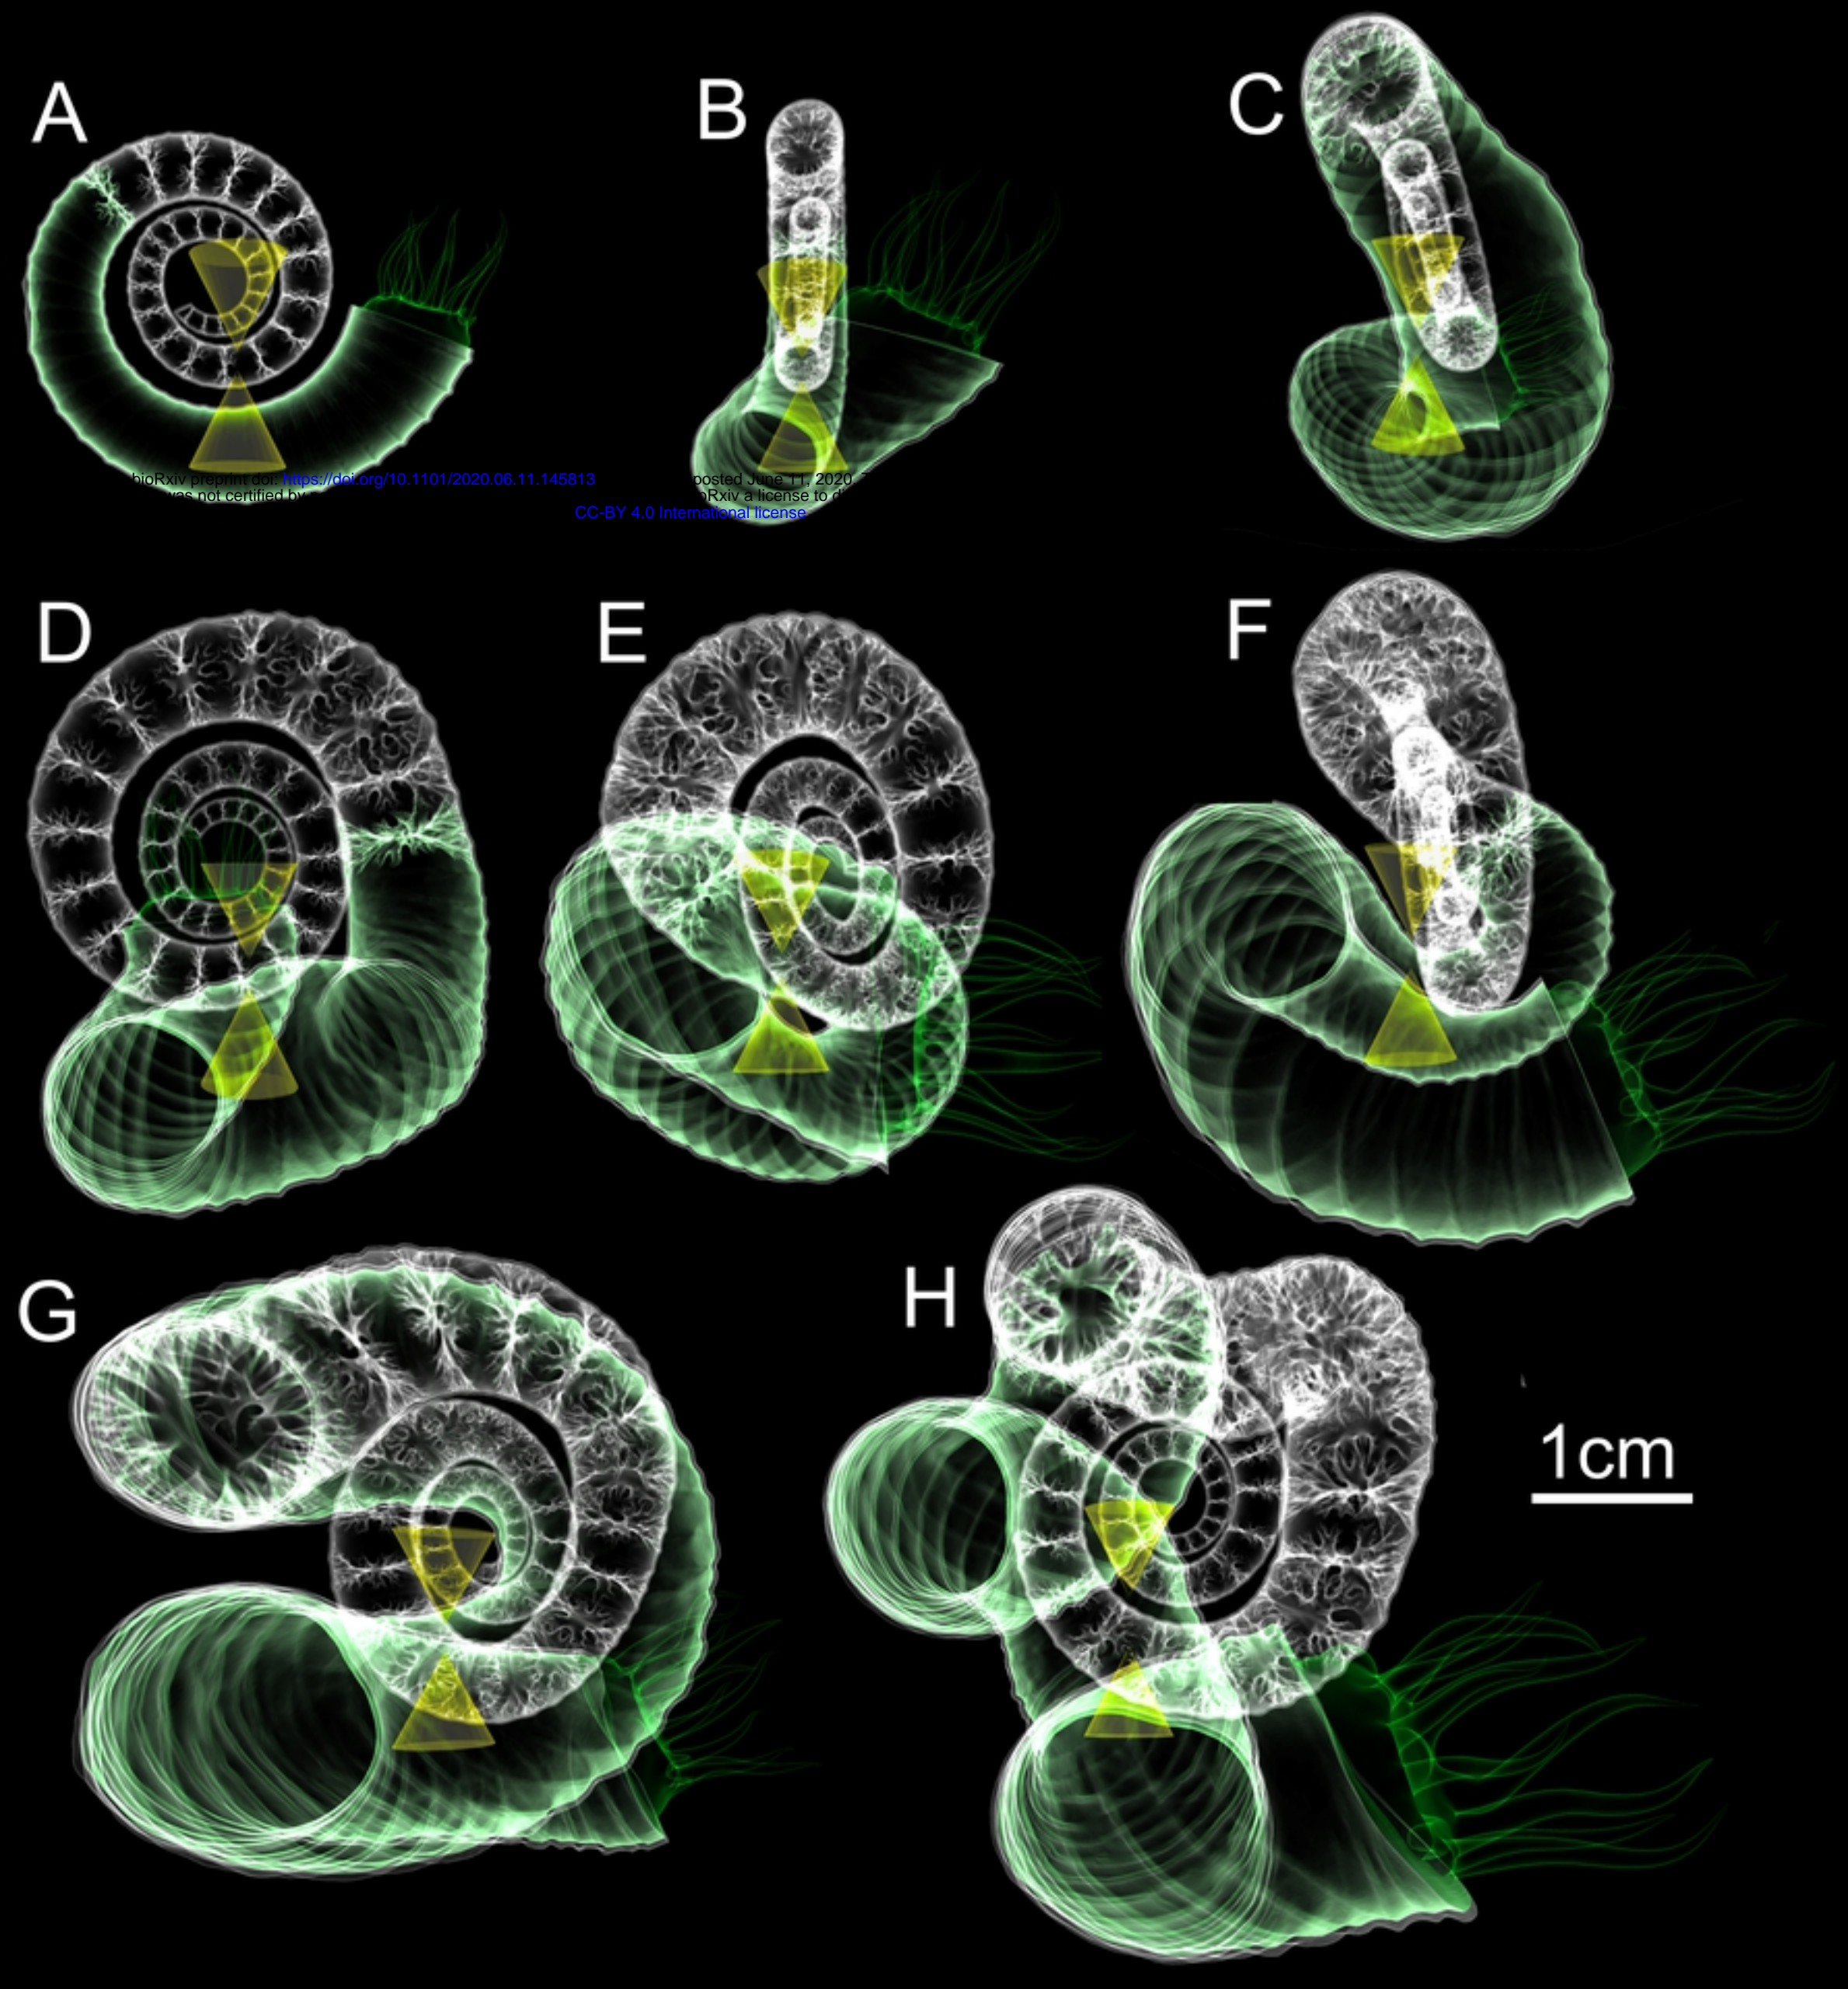

Figure 5



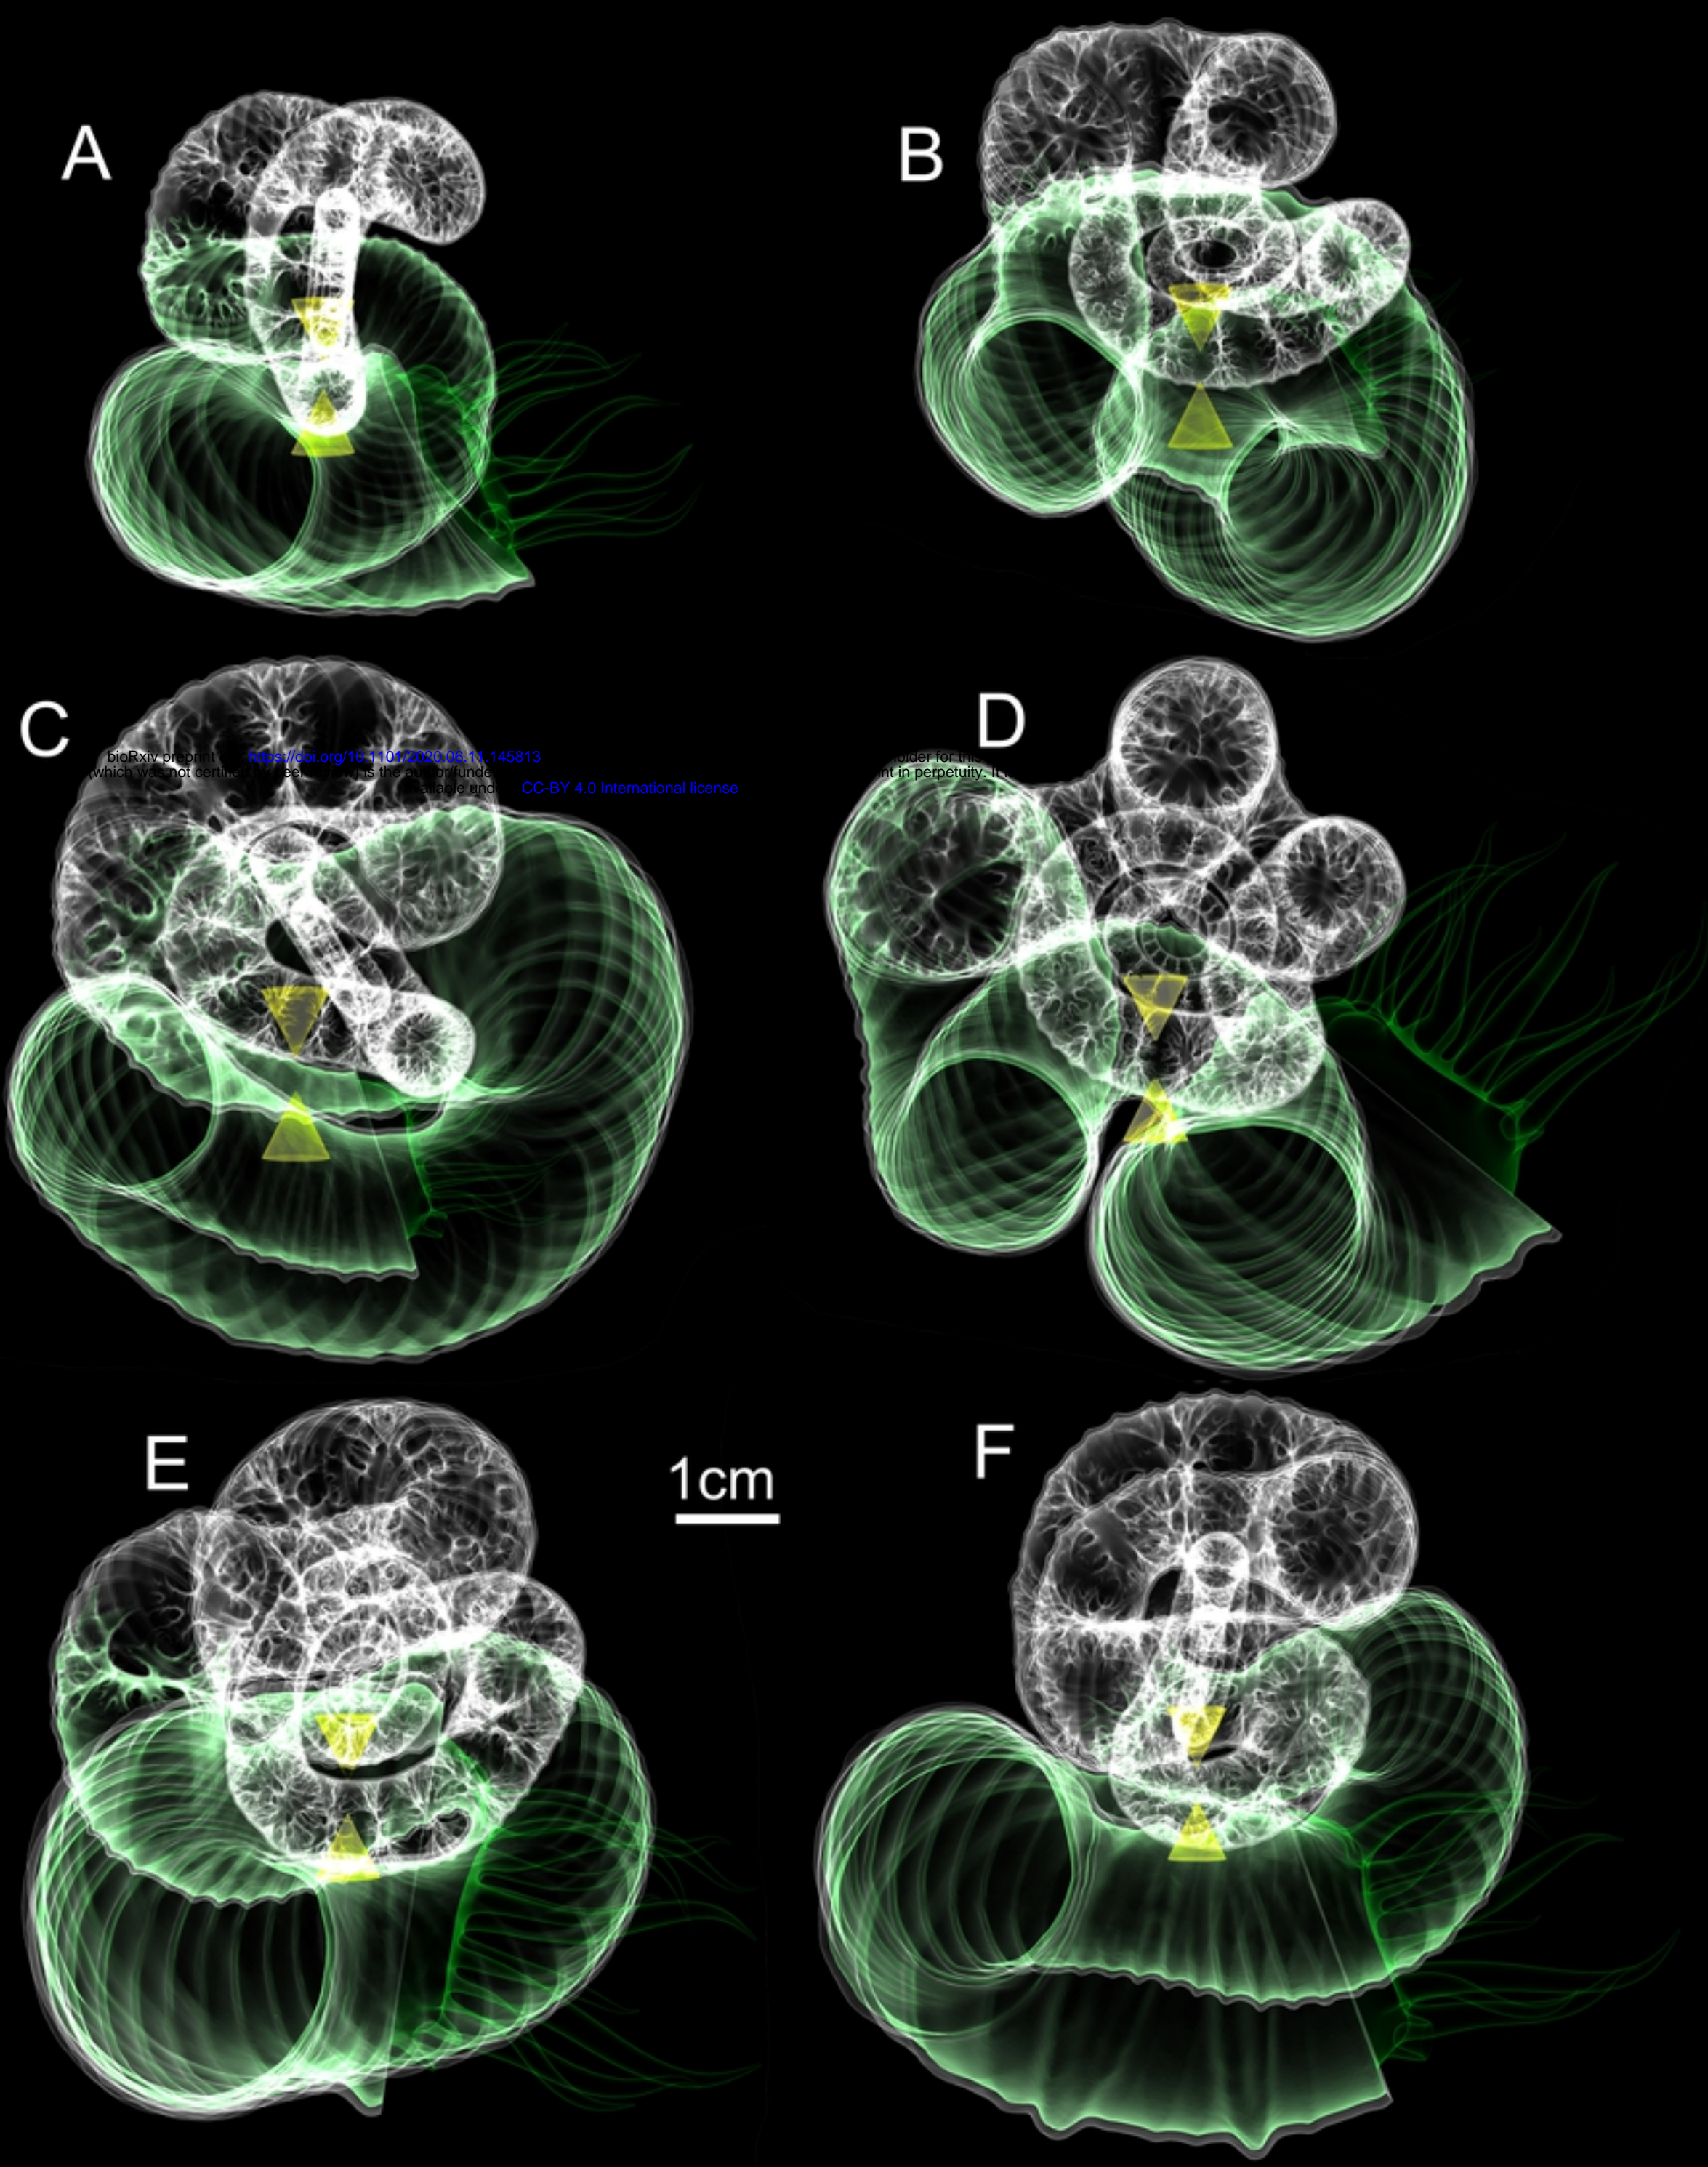

Figure 6



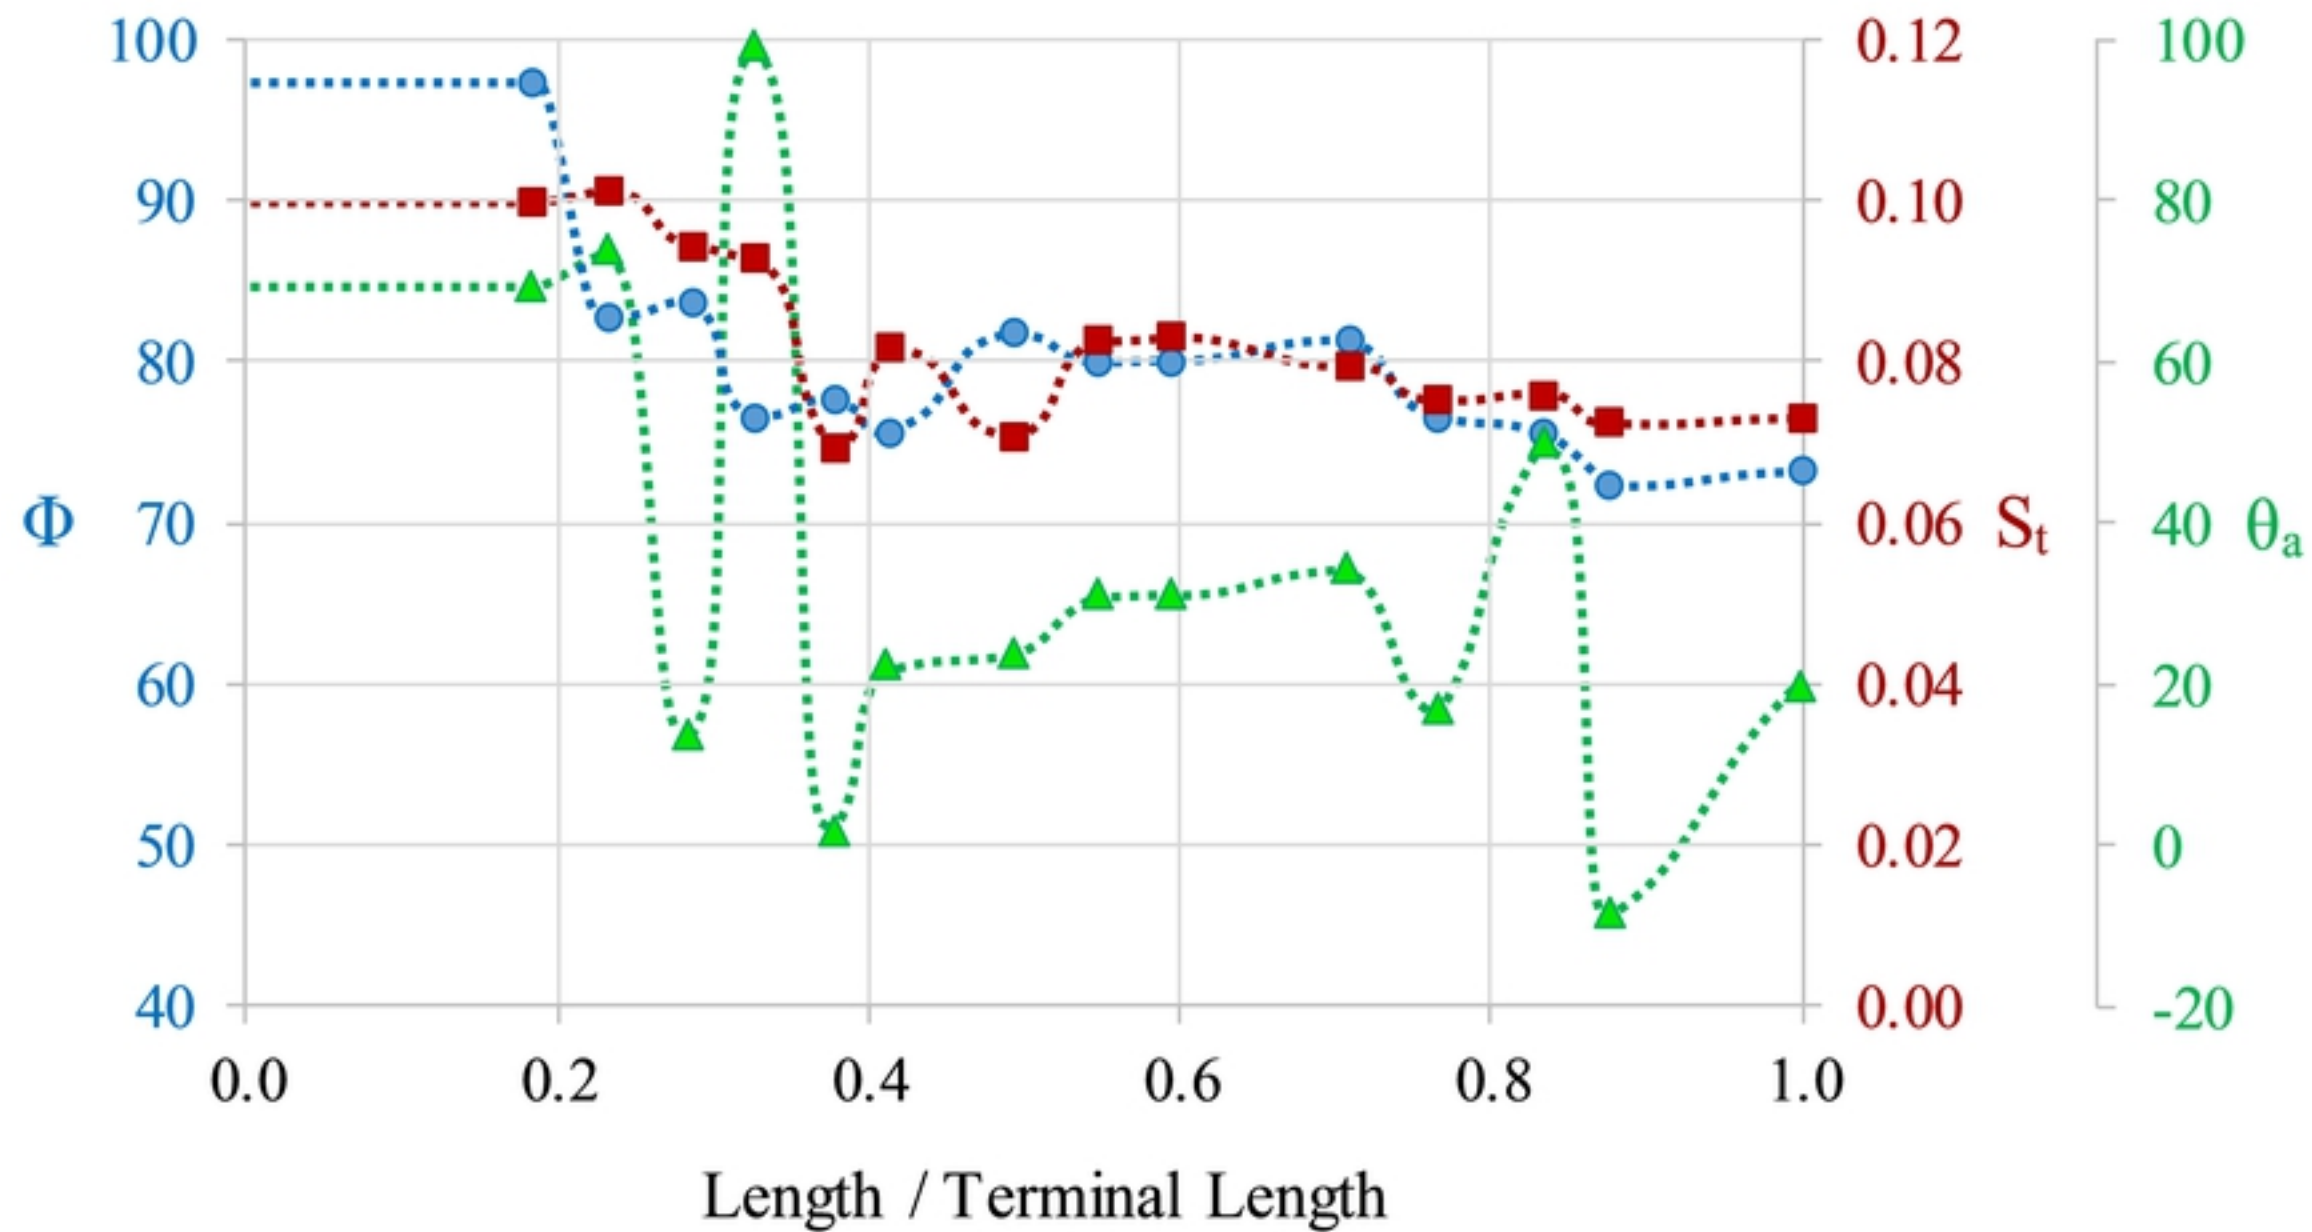

Figure 7

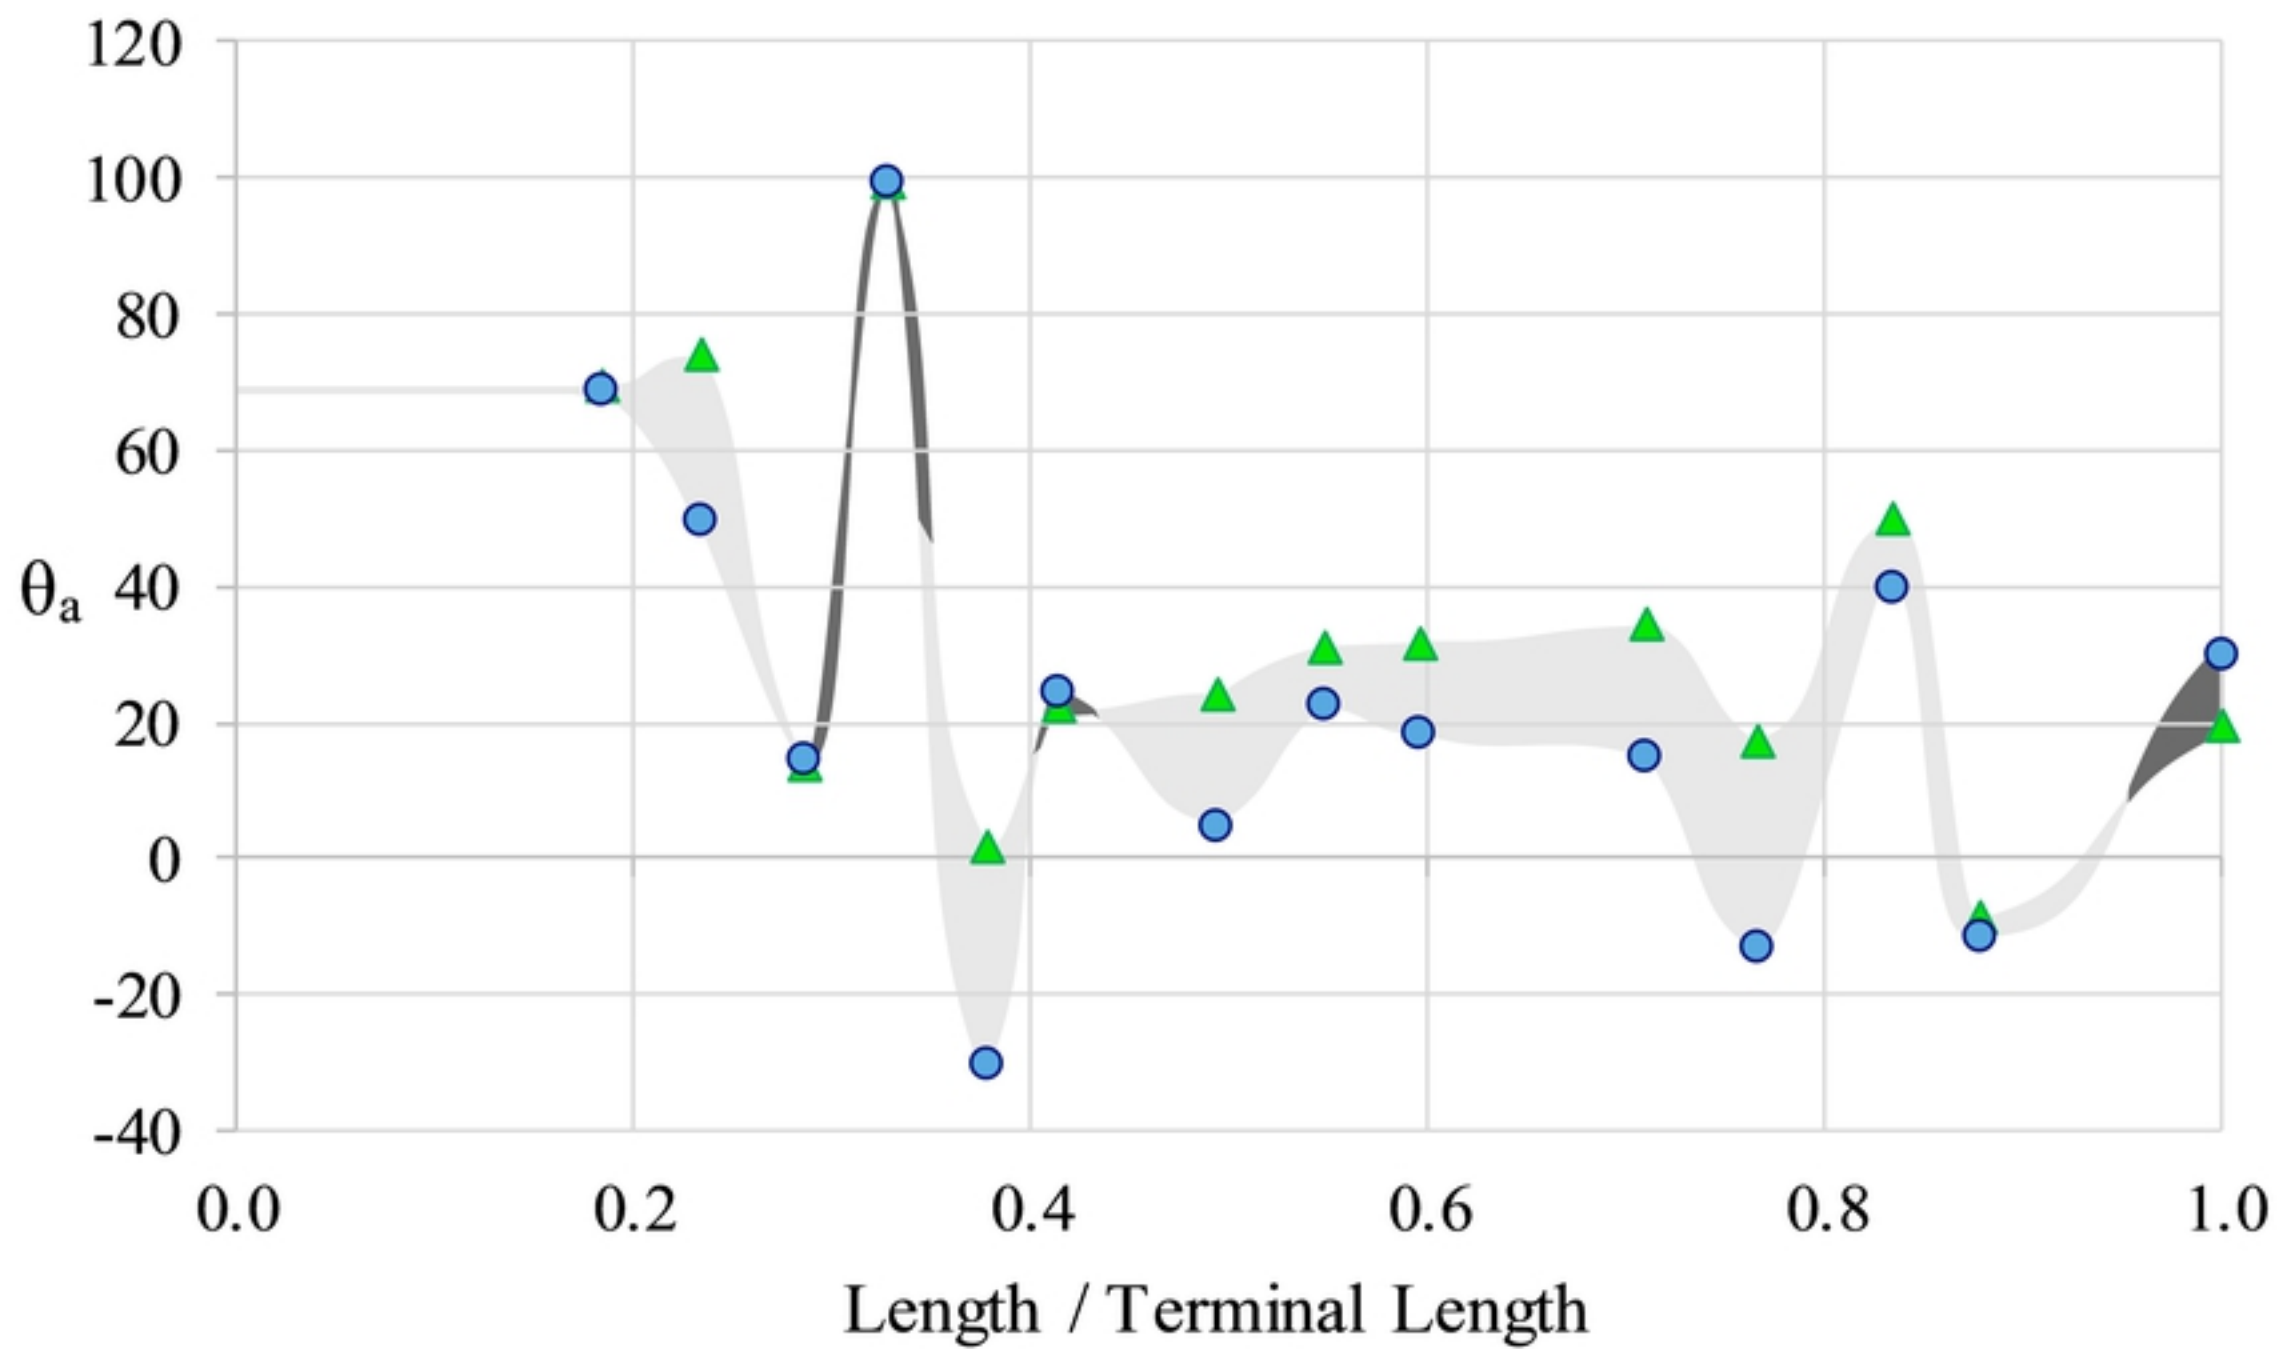

Figure 8

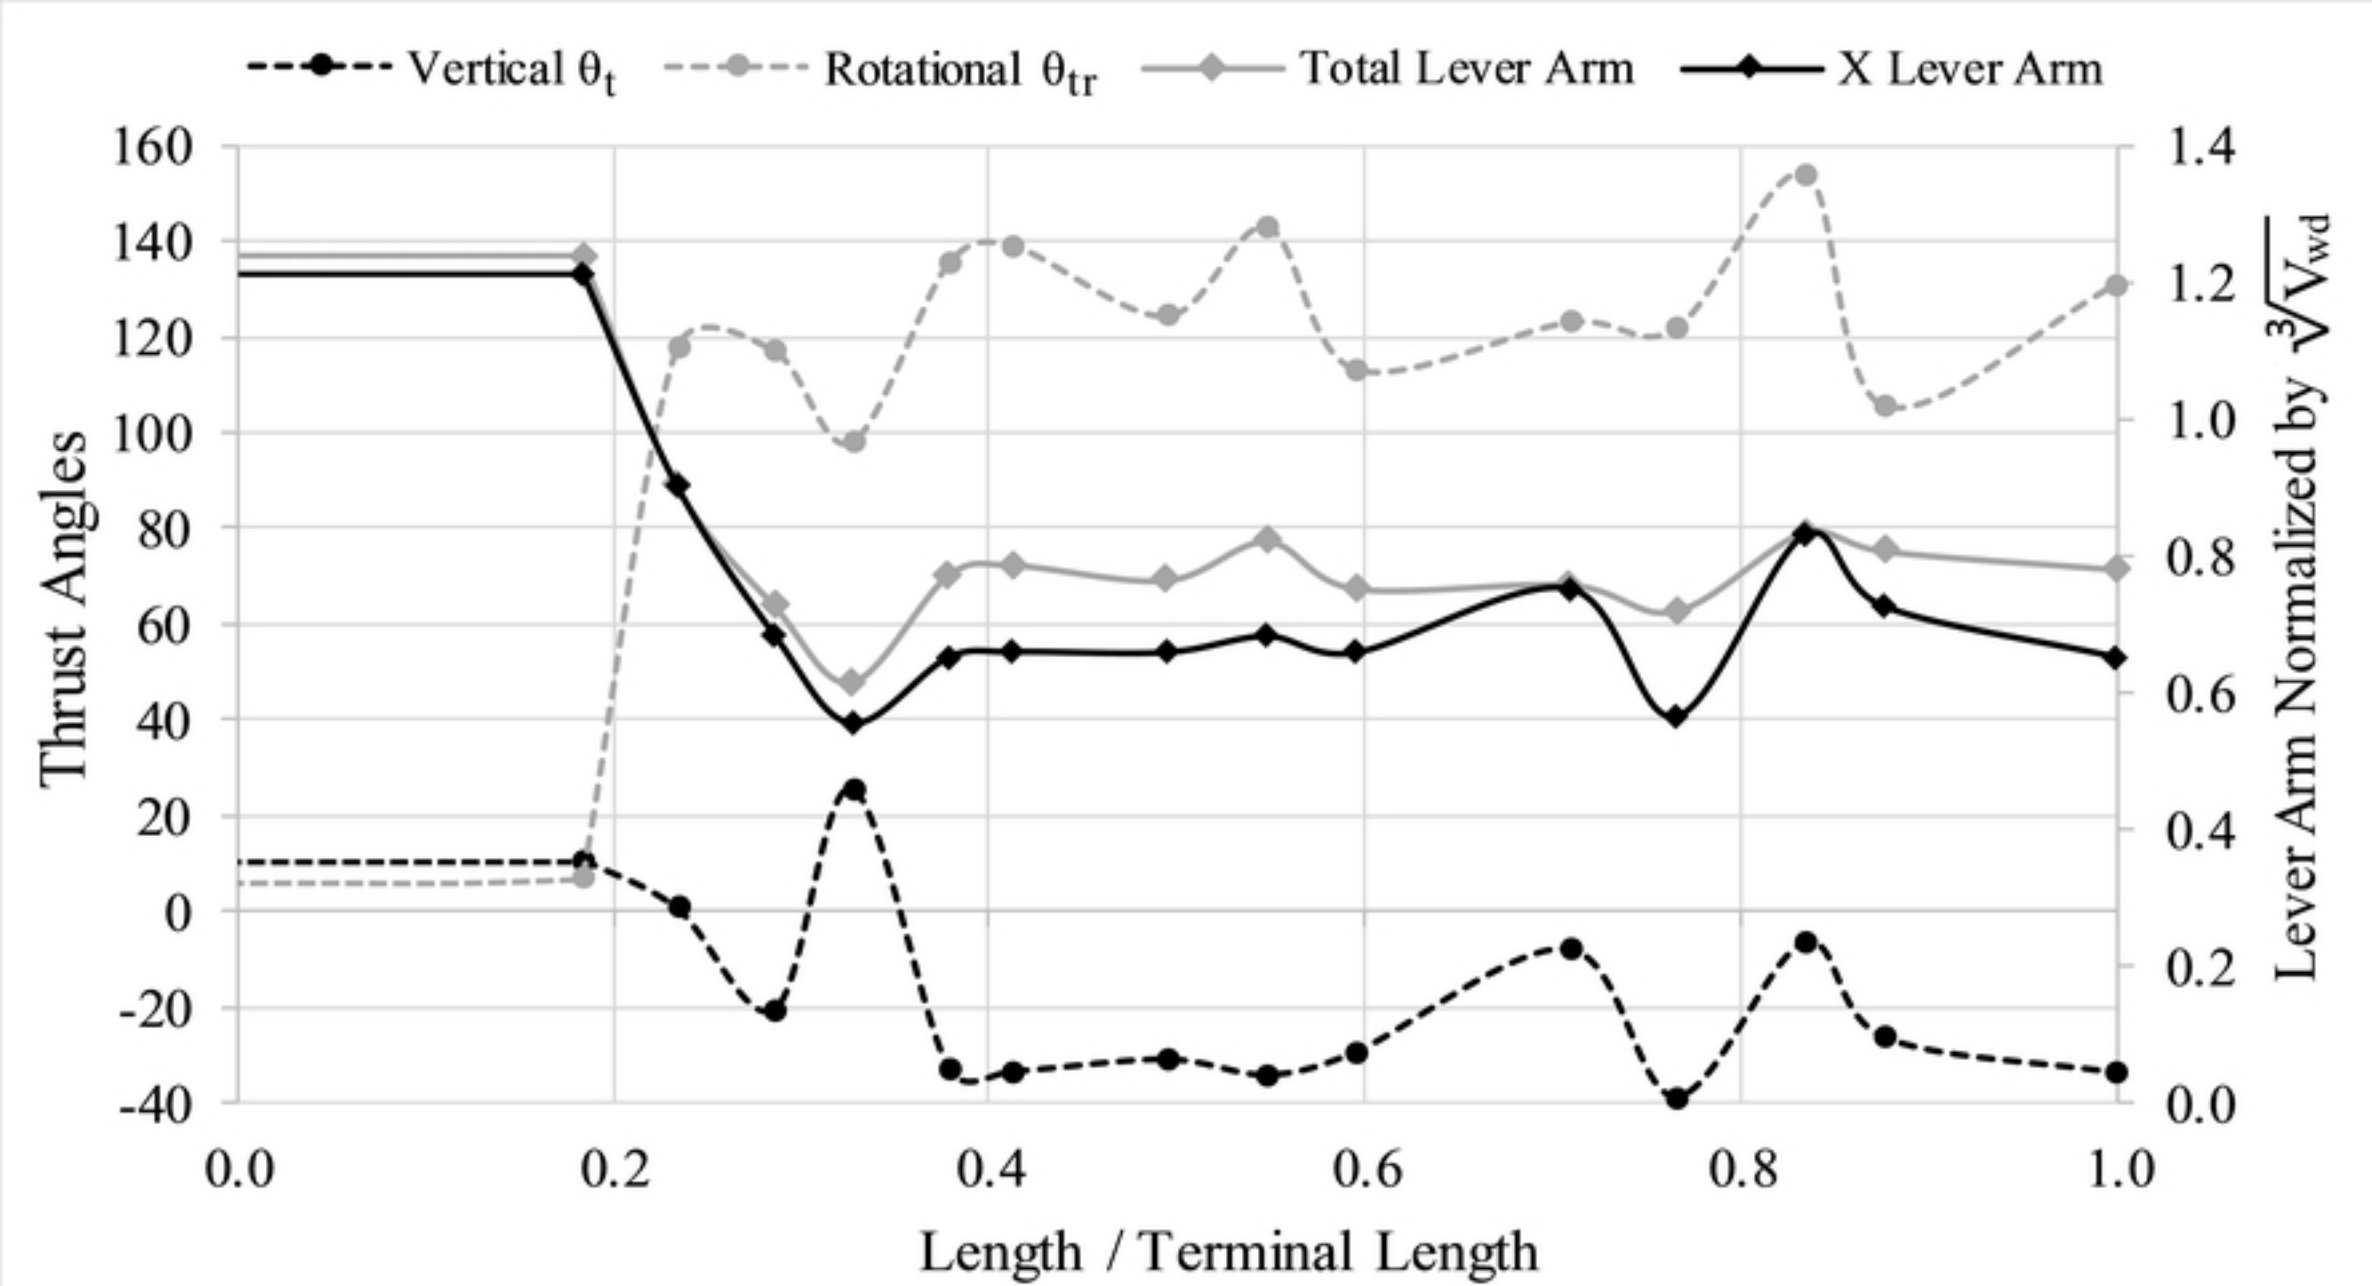

Figure 9
